# Supplementary material for: Bis-(1,2,4-triazin-3-yl) ligand structure driven selectivity reversal between Am3+ and Cm3+: solvent extraction and DFT studies
Source: Royal Society of Chemistry journal article supplement (doi:10.1039/d1dt00307k), 2021-01-01
Supplement: d1dt00307k1.pdf [file d1dt00307k1.pdf]

## Supporting Information

### **Bis-(1,2,4-triazin-3-yl) ligand structure driven selectivity reversal between Am<sup>3+</sup> and Cm<sup>3+</sup>: Solvent extraction and DFT studies**

Arunasis Bhattacharyya,<sup>a\*</sup> S.A. Ansari,<sup>a</sup> N.S. Karthikeyan,<sup>b</sup> C. Ravichandran,<sup>b</sup>  
B. Venkatachalapathy,<sup>b</sup> T.S. Rao,<sup>c</sup> H. Seshadri,<sup>d</sup> P.K. Mohapatra<sup>a\*</sup>

---

<sup>a</sup>Radiochemistry Division, Bhabha Atomic Research Centre, Mumbai – 400 085, INDIA.  
E-mail: arun12@barc.gov.in and mpatra@barc.gov.in

<sup>b</sup>Easwari Engineering College, Ramapuram, Chennai – 600089, INDIA.

<sup>c</sup>Water & Steam Chemistry Division, Bhabha Atomic Research Centre, Kalpakkam – 603102, INDIA.

<sup>d</sup>Safety Research Institute, Atomic Energy Regulatory Board, Kalpakkam – 603 102, INDIA.

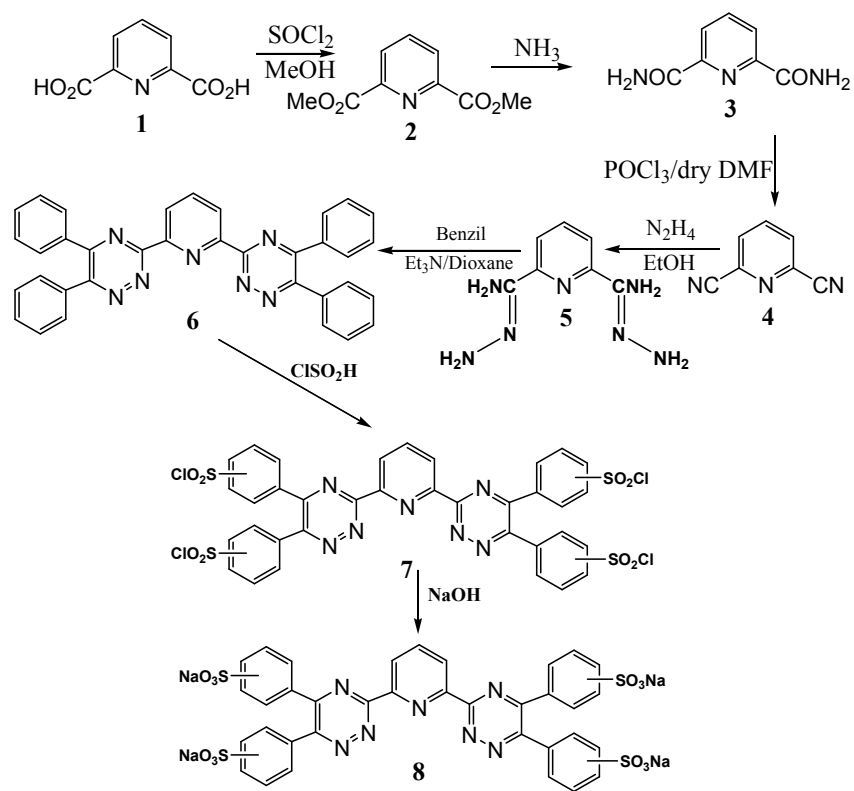

**Scheme 1 - Synthesis of SO<sub>3</sub>PhBTP (8)**

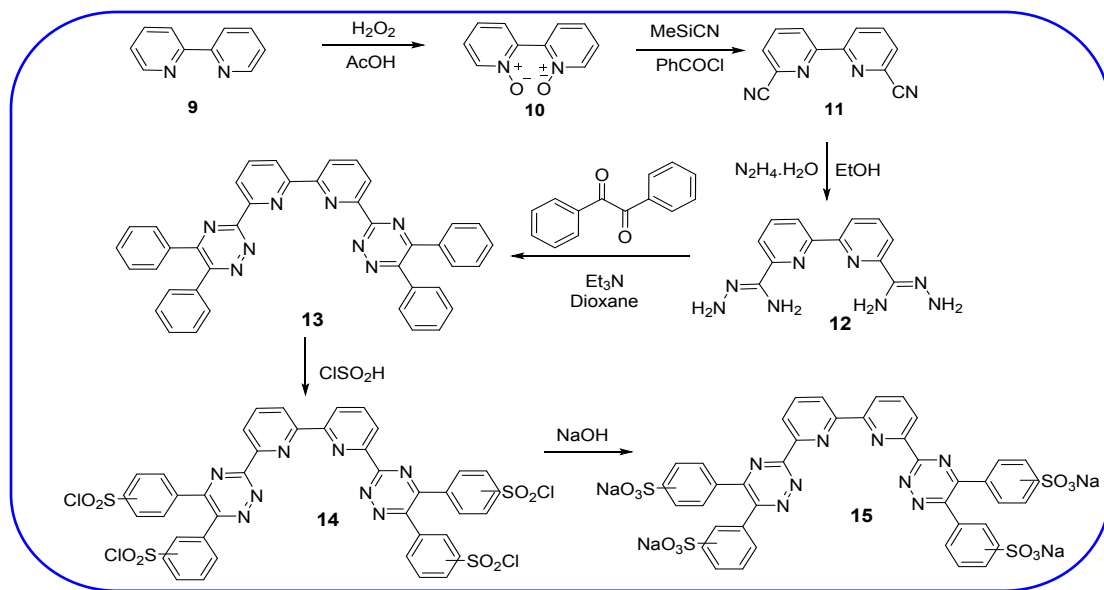

**Scheme 2. Synthesis of SO<sub>3</sub>PhBTBP (15)**

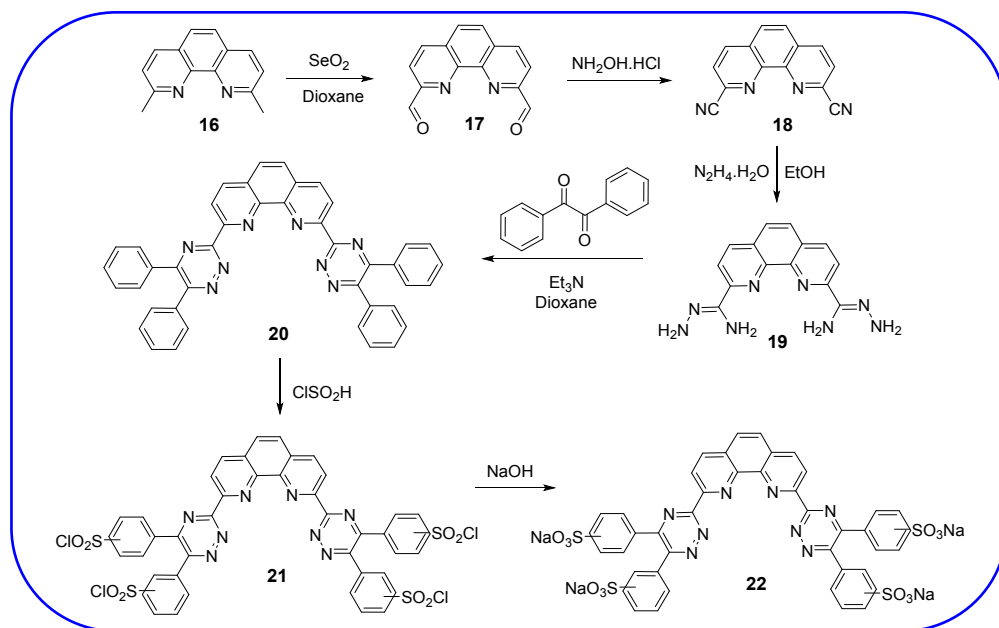

**Scheme 3 - Synthesis of SO<sub>3</sub>PhBTPhen (22)**

### Synthesis of dimethyl pyridine-2,6-dicarboxylate (2)

A suspension of pyridine-2,6-dicarboxylic acid (30 mmol) in methanol was slowly added to methanolic Thionyl chloride (75 mmol) at 0°C (ice bath), and the resulting mixture was stirred and refluxed for 14 hrs. The reaction mixture was cooled and quenched with ice-cold water and extracted with chloroform (3 x 50 ml). The organic phases were washed with saturated  $\text{NaHCO}_3$  and dried with  $\text{MgSO}_4$ . The solvent was concentrated under reduced pressure to yield pure pyridine-2,6-dicarboxylate(2) as a white solid. Yield - 88%; mp 120-122°C.  $^1\text{H}$  NMR: ( $\text{CDCl}_3$ , 400MHz)  $\delta$ : 4.03 (s,6H), 8.04-8.08 (t,1H), 8.32-8.34 (d, 2H) ppm.  $^{13}\text{C}$  NMR: ( $\text{CDCl}_3$ , 400 MHz)  $\delta$ : 53.17, 128.03, 138.40, 148.16, 165.00 ppm.

### Synthesis of pyridine-2,6-dicarboxamide (3)

In a dry round bottom flask, dimethyl pyridine-2,6-dicarboxylate (5.1 mmol) was dissolved in an ammonia solution (1.8ml). The solution temperature was brought up to ~40° C and stirred vigorously for 1 hour. The reacting reaction progress was monitored by TLC analysis. The reaction mass was cooled in an ice bath for 2-3 hours, and the resulting solid was filtered,

washed with deionised water followed by vacuum dry obtained white solid of pyridine-2,6-dicarboxamide (3). Yield – 91%; mp 325-330°C. <sup>1</sup>H NMR (DMSO-d<sub>6</sub>, 400MHz) δ:7.71 (s, 2H) 8.12–8.20 (m, 3H)8.91 (s, 2H) ppm. <sup>13</sup>C NMR (DMSO-d<sub>6</sub>, 400MHz): 124.72, 139.70, 149.4, 165.97ppm.

#### **Synthesis of pyridine-2,6-dicarbonitrile (4)**

To a stirred solution of Pyridine-2,6-dicarboxamide (3mmol) in 15 ml of dry DMF at 0°C and Phosphorus oxychloride (18 mmol) was added over 5 min dropwise. The reaction mixture was vigorously stirred overnight at room temperature and poured into ice water. The aqueous layer was extracted with DCM (30ml x 3), and the combined organic layer was washed with water (30ml x 3) then dried with anhydrous Na<sub>2</sub>SO<sub>4</sub>; the solvent was removed by rotavapor. The product pyridine-2,6-dicarbonitrile(4) was obtained with 64% yield as a white power; mp 120-123°C. <sup>1</sup>H NMR (CDCl<sub>3</sub>, 400 MHz) δ: 7.94-7.96(d, 2H) 8.08-8.12 (t, 1H) ppm. <sup>13</sup>C NMR (CDCl<sub>3</sub>, 400MHz): 115.47, 131.18, 135.31, 138.95 ppm.

#### **Synthesis of pyridine-2,6-dicarbohydrazonamide (5)**

Hydrazine hydrate (10 mL, 75 %) was added to the pyridine-2,6-dicarbonitrile (3.9 mmol) dissolved in ethanol (10ml). The resulting solution was stirred at room temperature for 14-15 days. The crude mixture was poured into ice water (100 ml), and the resulting solid was filtered. The solid residue was dried to give pyridine-2,6-dicarbohydrazonamide as a pale white powder with 45% yield; mp 245°C. <sup>1</sup>H NMR (DMSO-d<sub>6</sub>, 400 MHz) δ: 5.32 (s, 4H), 6.12 (s, 4H), 7.64-7.68 (dd, 1H), 7.81-7.83 (d, 2H) ppm. <sup>13</sup>C NMR (DMSO-d<sub>6</sub>, 400 MHz) δ: 118.5, 136.4, 144.2, 150.6 ppm.

#### **Synthesis of 2,6-bis(5,6-diphenyl-1,2,4-triazin-3-yl)pyridine (6)**

A solution of benzil (1.5.7 mmol), Triethylamine (4.6 mL) and pyridine-2,6-dicarbohydrazonamide (2.6 mmol) in 1,4-dioxane (50 mL) was refluxed for 3 days. The reaction mixture was then cooled to room temperature and the solid was filtered and washed with ether. The residue was purified using column chromatography to provide 2,6-bis(5,6-diphenyl-1,2,4-triazin-3-yl) pyridine as yellow solid. Yield – 88 %; mp 309-310°C. <sup>1</sup>H NMR (CDCl<sub>3</sub>, 400 MHz) δ: 7.37-7.49(m, 12H), 7.66-7.68 (m, 4H), 7.79-7.81 (m, 4H), 8.19-8.23 (t, 1H), 8.91-8.93 (d,

2H)ppm. <sup>13</sup>C NMR (CDCl<sub>3</sub>, 400 MHz) δ: 125.61, 128.54, 128.72,129.58, 129.87, 130.15, 130.89, 135.36, 135.65, 138.39, 153.56, 156.27, 156.53, 160.51ppm.

### **Synthesis of 3,3',3'',3'''-(pyridine-2,6-diylbis(1,2,4-triazine-3,5,6-triyl))tetrabenzenesulfonyl chloride (7)**

2,6-Bis(5-phenyl-1,2,4-triazin-3-yl)pyridine (0.923 mmol) was dissolved in chlorosulfonic acid (10 mL) in a 50 mL round-bottom flask. The reaction mixture was stirred at 170°C for 3 hours. After cooling to room temperature, the reaction mass was slowly poured into the ice. The solid precipitate was filtered off and washed twice using deionised water to give yellow-green powder in 97% yield; mp above 300°C. <sup>1</sup>H NMR (DMSO-d<sub>6</sub>, 400 MHz) δ: 7.33-7.36 (m, 8H), 7.61-7.73 (m, 4H), 8.19-8.22 (m, 4H), 8.40-8.43 (t, 1H), 8.72-8.74 (d, 2H)ppm. <sup>13</sup>CNMR (DMSO-d<sub>6</sub>, 400MHz) δ: 126.22, 126.38, 126.90, 127.36, 128.36, 130.50, 130.70, 135.33,135.49, 139.52, 148.80, 148.88, 153.86, 156.31, 156.72, 160.82 ppm.

### **Synthesis of sodium 3,3',3'',3'''-(pyridine-2,6-diylbis(1,2,4-triazine-3,5,6-triyl)) tetra benzenesulfonate (SO<sub>3</sub>PhBTP) (8) - L<sub>I</sub>**

A mixture of 3,3',3'',3'''-(pyridine-2,6-diylbis(1,2,4-triazine-3,5,6-triyl))tetrabenzene (0.320 mmol) and NaOH (2.56 mmol) in methanol (30 mL) was stirred and refluxed for 4 h. After cooling to room temperature, the reaction mass was filtered and the resulting solution was neutralized with 2M HCl to 7-8 pH. The product separated was washed with cold methanol followed by acetone and dried in vacuum to give sodium 3,3',3'',3'''-(pyridine-2,6-diylbis(1,2,4-triazine-3,5,6-triyl)) tetra benzenesulfonate (8) as greenish black solid with 70% yield; mp above 300 °C. <sup>1</sup>H NMR (DMSO-d<sub>6</sub>, 400 MHz) δ: 7.25-7.34 (m, 8H), 7.60-7.75 (m, 4H), 8.26-8.29 (m, 4H), 8.43-8.47 (t, 1H), 8.75-8.77 (d, 2H), ppm. <sup>13</sup>C NMR (DMSO-d<sub>6</sub>) δ: 126.93, 127.36, 128.18, 130.28, 130.50, 135.18, 135.35, 149.34, 156.36, 156.87 ppm.

### **Synthesis of bipyridine N- oxide (10)**

Hydrogen peroxide (25.24 mmol) was added to the 2,2'-bipyridine(6.40 mmol) dissolved in acetic acid (20 mL). The resulting solution was stirred at 75°C for 8 h. After the completion of the reaction, the reaction mass was allowed to cool to room temperature and stirring was continued overnight. The solution was diluted with acetone (100 mL) and the precipitated solid

was filtered. The solid was allowed to dry in air to afford the title compound (10) as a white solid (0.799 gm, 67 %), mp: 295°C. <sup>1</sup>H NMR: (D<sub>2</sub>O, 400MHz) δ: 7.66–7.69(m, 4H), 7.75–7.79(m, 2H), 8.38–8.40 (m, 2H) ppm. <sup>13</sup>C NMR:(D<sub>2</sub>O,400MHz) δ: 128.4, 128.8, 131.4, 139.7, 141.7 ppm.

### **Synthesis of 2,2'-Bipyridine-6,6'-dicarbonitrile (11)**

A solution of 2,2'-Bipyridine-1,1'-dioxide (2.66 mmol) in DCM (10 mL) and 7.98 mmol of trimethylsilyl cyanide, 7.98 mmol of benzoyl chloride was stirred at room temperature for 3 days. After 3 days, the reaction mixture was refluxed for 24h and the reaction mass was stirred vigorously with 10ml of 10% KOH solution. The precipitate was filtered off and rinsed with water and ether to yield 0.2 g (41%) of off-white powder. (0.225 gm, 41%),mp: 245-250°C. <sup>1</sup>H NMR: (CDCl<sub>3</sub>, 400MHz) δ:7.77-7.79 (dd,2H), 8.00-8.04 (dd,2H), 8.71-8.73 (dd, 2H) ppm. <sup>13</sup>CNMR:(CDCl<sub>3</sub>, 400MHz) δ:117.0, 124.7, 129.1, 133.4, 138.4, 155.4 ppm.

### **Synthesis of 1,10-phenanthroline-2,9-dicarbaldehyde (17)**

Selenium dioxide (30.57 mmol) was reflux in dioxane (150 mL) and water (3 mL). A solution of 2, 9-dimethyl-1, 10-phenanthroline (3 gm, 14.42 mmol) in dioxane was added dropwise and heated under reflux for 3 hr. The reaction mass was filtered while hot and the filtrate was cool to 0°C. The precipitated solid was filtered and washed with dioxane (30 mL), and triturated with chloroform. The filtrate was evaporated to afford dialdehyde 1,10-Phenanthroline-2,9-dicarbaldehyde (17) as a light yellow solid (43%), mp: 241°C. <sup>1</sup>H NMR: (DMSO-d<sub>6</sub>, 400MHz) δ: 8.27 (s, 2H), 8.41 (s, 2H) 8.77 (dd, 2H), 10.34 (d, 2H) ppm. <sup>13</sup>C NMR: (DMSO-d<sub>6</sub>, 400MHz) δ: 120.5,131, 138.8, 194 ppm.

### **Synthesis of 1,10-Phenanthroline-2,9- dicarbonitrile (18)**

1,10-Phenanthroline-2,9-dicarbaldehyde (21.18 mmol), hydroxylamine hydrochloride (46.59 mmol, 2.2 eq) and triethylamine (139.83 mmol, 6.6 eq) was added in dry acetonitrile (350 mL). The mixture was heated under reflux for 3 h. *p*-toluenesulfonyl chloride (69.91 mmol, 3.3 eq) and DBU (63.54 mmol, 3 eq) was added after cooling the reaction mixture and heated under reflux for 24 h. The mixture was filtered while still hot and the solid residue was washed with hot acetonitrile (15mL). The filtrate was evaporated and the obtained brown semi-solid was triturated with methanol. The undissolved solids are filtered and washed with methanol and ether

to afford 1,10-Phenanthroline-2,9- dicarbonitrile (18) as an off-white solid (1.70 gm, 35%).<sup>1</sup>H NMR: (DMSO-d<sub>6</sub>, 400MHz) δ: 8.28 (s, 2H), 8.42-8.44 (d, 2H), 8.84-8.86 (d, 2H) ppm. <sup>13</sup>C NMR: (DMSO-d<sub>6</sub>, 400MHz) δ: 118.1, 128.0, 129.7, 131.0, 133.3, 139.1, 145.3 ppm.

### **General Synthesis of 2,2'-Bipyridine-6,6'-dicarbohydrazonamide (12) & 1,10-phenanthroline-2,9-bis(carbohydrazonamide) (19)**

Hydrazine hydrate (8 mL, 75 %) was added to the respective carbonitrile (2.43 mmol) dissolved in ethanol (20mL). The resulting solution was stirred at room temperature for 14-15 days. The crude reaction mixture was poured into ice water (100 mL), and the resulting solid was filtered. The solid product was dried to give title compound.

#### **2,2'-Bipyridine-6,6'-dicarbohydrazonamide (12)**

Pale-yellow powder (0.565 gm, 87%).<sup>1</sup>H NMR: (DMSO-d<sub>6</sub>, 400MHz) δ: 5.59 (s, 4H), 6.13(s, 4H), 7.89-7.94 (t, 2H), 7.97-8.01 (dd, 2H), 8.63-8.91 (dd, 2H) ppm.

#### **1,10-phenanthroline-2,9-bis(carbo hydrazonamide) (19)**

Yellow powder (0.512 gm, 69%), mp above 300 °C.<sup>1</sup>H NMR: (DMSO-d<sub>6</sub>, 400MHz) δ: 5.64 (s, 4H), 6.13 (s, 4H), 7.94 (s, 2H), 8.28-8.30 (d, 2H), 8.37-8.39 (d, 2H) ppm. <sup>13</sup>C NMR: (DMSO-d<sub>6</sub>, 400MHz) δ: 119.4, 128.6, 136.5, 143.8, 143.9, 151.7 ppm.

### **General Synthesis of Compound 6,6'-Bis(5,6-diphenyl-1,2,4-triazin-3-yl)-2,2'-bipyridine (13) & 9-Bis(5,6-diphenyl-1,2,4-triazin-3-yl)-1,10-phenanthroline (20)**

The solution of respective dicarbohydrazonamide (1.69 mmol), benzil (16.28 mmol, 2.2 eq) and triethylamine (15 mL) in 1,4-dioxane (100 mL) was refluxed for 3 days. The reaction mixture was then cooled to room temperature and the solid was filtered and washed with DCM. The solid product was purified using column chromatography.

#### **6,6'-Bis(5,6-diphenyl-1,2,4-triazin-3-yl)-2,2'-bipyridine (13)**

Yellow solid (78% yield), mp: above 300 °C.<sup>1</sup>H NMR: (CDCl<sub>3</sub>, 400MHz) δ: 7.40-7.49 (m, 12H), 7.67-7.69 (m, 4H), 7.76-7.78 (m, 4H), 8.12-8.16 (t, 2H), 8.74-8.76 (dd, 2H), 9.01-9.03 (dd, 2H)



ppm.  $^{13}\text{C}$  NMR:( $\text{CDCl}_3$ , 400MHz):  $\delta$ : 123.4, 124.5, 128.6, 128.7, 129.6, 129.8, 130.0, 130.8, 135.3, 135.7, 138.1, 152.2, 156.0, 156.2, 156.3, 160.7 ppm.

### **9-Bis(5,6-diphenyl-1,2,4-triazin-3-yl)-1,10-phenanthroline (20)**

Yellow solid (47% Yield), mp: above 290°C.  $^1\text{H}$  NMR: ( $\text{CDCl}_3$ , 400MHz)  $\delta$ : 7.35–7.44 (m, 12H), 7.74 (s, 4H), 7.93 (d, 4H), 7.98 (s, 2H), 8.51-8.53 (d, 2H), 9.02-9.03 (d, 2H) ppm.  $^{13}\text{C}$  NMR:( $\text{CDCl}_3$ , 400MHz):  $\delta$ : 123.4, 127.7, 128.6, 128.7, 129.0, 129.6, 130.0, 130.4, 130.8, 135.4, 135.5, 137.4, 146.6, 153.0, 156.3, 156.5, 160.8 ppm.

### **General Synthesis of 3,3',3'',3'''-[3-(2,2'-Bipyridine-6,6'-diyl)-1,2,4-triazine-5,5,6,6-tetrayl]tetrabenzenesulfonyl chloride (14) & 3,3',3'',3'''-[3-(1,10-Phenanthroline-2,9-diyl)-1,2,4-triazine-5,5,6,6-tetrayl] tetra benzenesulfonyl Chloride (21)**

The respective bipyridine / phenanthroline (0.467 mmol) was added to chlorosulfonic acid (10 mL) and stirred at 170°C for 5 h. After cooling to room temperature, the reaction mass was slowly poured into the ice. The solid precipitate was filtered off and washed using water to afford the title compound.

### **3,3',3'',3'''-[3-(2,2'-Bipyridine-6,6'-diyl)-1,2,4-triazine-5,5,6,6-tetrayl] tetrabenzenesulfonyl chloride (14)**

Brown powder. (90% Yield), mp: above 300 °C.  $^1\text{H}$  NMR: ( $\text{DMSO}-d_6$ , 400MHz)  $\delta$ : 7.28–7.37 (m, 8H), 7.61–7.75 (m, 4H), 8.22 (t, 2H), 8.33–8.37 (m, 4H), 8.64-8.66(d, 2H), 8.86-8.88 (d, 2H) ppm.

### **3,3',3'',3'''-[3-(1,10-Phenanthroline-2,9-diyl)-1,2,4-triazine-5,5,6,6-tetrayl] tetra benzenesulfonyl Chloride (21)**

Brown solid (85% Yield), mp: above 300 °C.  $^1\text{H}$  NMR ( $\text{DMSO}-d_6$ , 400MHz)  $\delta$ : 7.39 (m, 6H), 7.68–7.69 (m, 6H), 8.16–8.38 (m, 4H), 8.38 (s, 2H), 8.95-8.97 (d, 2H), 9.05-9.06 (d, 2H) ppm.

### **General Synthesis of Tetrasodium 3,3',3'',3'''-[3-(2,2'-bipyridine-6,6'-diyl)-1,2,4-Triazine -5,5,6,6-tetrayl] tetra benzenesulfonate, $\text{SO}_3\text{PhBTBP}$ (15) & Compound sodium 3,3',3'',3'''-((1,10-phenanthroline-2,9-diyl) bis (1,2,4-triazine- 3,5,6-triyl)) tetra benzene sulfonate, $\text{SO}_3\text{PhBTPhen}$ (22)**

The respective tetrabenzene sulfonyl chloride (0.987 mmol) and NaOH (5.92 mmol, 6 eq) was added in MeOH (100 mL) and reflux for 4 h. The solution was allowed to cool to room temperature and neutralized by 2M HCl. The filtrate was diluted with acetone and the precipitated solid was filtered and washed with methanol and acetone. The solid was dried to afford the title compound.

**Tetrasodium 3,3',3'',3'''-[3-(2,2'-bipyridine-6,6'-diyl)-1,2,4-Triazine -5,5,6,6-tetrayl]tetra benzenesulfonate, SO<sub>3</sub>PhBTBP (15)**

Brown solid (50% Yield), mp: above 300 °C. <sup>1</sup>H NMR: (DMSO-d<sub>6</sub>, 400MHz) δ: 7.35–7.38 (m, 6H), 7.63–7.77 (m, 6H), 8.20 (t, 2H), 8.32–8.38 (m, 4H), 8.64–8.67 (d, 2H), 8.86–8.88 (d, 2H) ppm. <sup>13</sup>C NMR: (DMSO-d<sub>6</sub>, 400MHz) δ: 131.0, 131.6, 132.2, 133.0, 133.1, 133.2, 134.3, 135.2, 135.3, 140.0, 140.2, 144.3, 153.7, 153.8, 154.0, 157.4, 160.4, 160.9, 161, 165.4 ppm.

**Sodium 3,3',3'',3'''-((1,10-phenanthroline-2,9-diyl) bis (1,2,4-triazine- 3,5,6-triyl)) tetra benzene sulfonate, SO<sub>3</sub>PhBTPhen (22)**

Brown solid (66% Yield), mp: above 300 °C. <sup>1</sup>H NMR (DMSO-d<sub>6</sub>, 400MHz) δ: 7.37 (m, 6H), 7.71–7.78 (m, 6H), 8.32–8.38 (m, 6H) 8.99 (m, 4H) ppm.

Signature SIF VIT VELLORE  
DMPC-S2

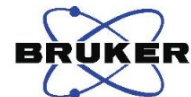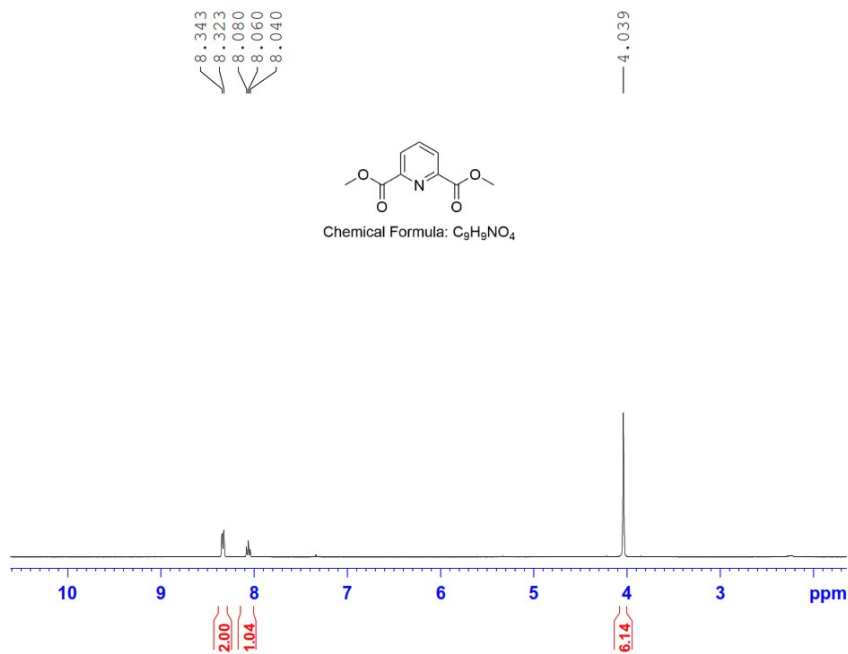

Current Data Parameters  
NAME Dr.SYN280917  
EXPNO 29  
PROCNO 1

F2 - Acquisition Parameters  
Date\_ 20171003  
Time 9.56 h  
INSTRUM spect  
PROBHD Z108618\_0505 ( )  
PULPROG zg30  
TD 65536  
SOLVENT cdcl3  
NS 16  
DS 2  
SWH 8012.820 Hz  
FIDRES 0.244532 Hz  
AQ 4.0894463 sec  
RG 71.13  
DW 62.400 usec  
DE 6.50 usec  
TE 297.2 K  
D1 1.00000000 sec  
TDO  
SFO1 400.2604716 MHz  
NUC1 1H  
P1 14.25 usec  
PLW1 14.00000000 W

F2 - Processing parameters  
SI 65536  
SF 400.2579789 MHz  
WDW EM  
SSB 0  
LB 0.30 Hz  
GB 0  
PC 1.00

$^1H$  NMR spectrum of dimethyl pyridine-2,6-dicarboxylate (2)

Signature SIF VIT VELLORE  
DMPC-S2

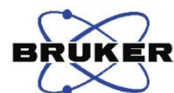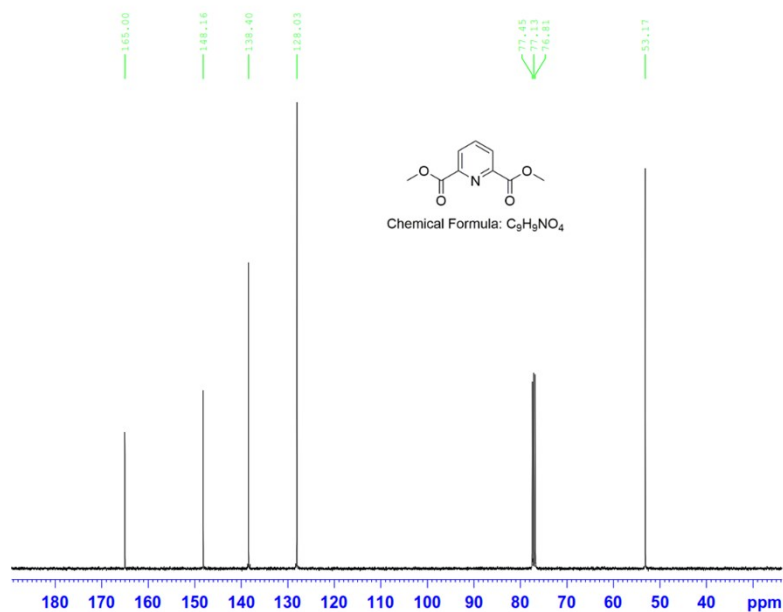

Current Data Parameters  
NAME Dr.SYN280917  
EXPNO 30  
PROCNO 1

F2 - Acquisition Parameters  
Date\_ 20171003  
Time 11.23 h  
INSTRUM spect  
PROBHD Z108618\_0505 ( )  
PULPROG zgpg30  
TD 65536  
SOLVENT cdcl3  
NS 512  
DS 4  
SWH 24038.461 Hz  
FIDRES 0.733596 Hz  
AQ 1.3631488 sec  
RG 112.69  
DW 20.800 usec  
DE 6.50 usec  
TE 298.9 K  
D1 2.00000000 sec  
D11 0.03000000 sec  
TDO 1  
SFO1 100.6550186 MHz  
NUC1 13C  
P1 9.80 usec  
PLW1 58.00000000 W  
SFO2 400.2596010 MHz  
NUC2 1H  
CPDPRG2 waltz16  
PCPD2 90.00 usec  
PLW2 14.00000000 W  
PLW12 0.35097000 W  
PLW13 0.17654000 W

F2 - Processing parameters  
SI 32768  
SF 100.6449542 MHz  
WDW EM  
SSB 0  
LB 1.00 Hz  
GB 0  
PC 1.40

$^{13}C$  NMR spectrum of dimethyl pyridine-2,6-dicarboxylate (2)

Signature SIF VIT VELLORE  
T12

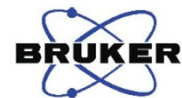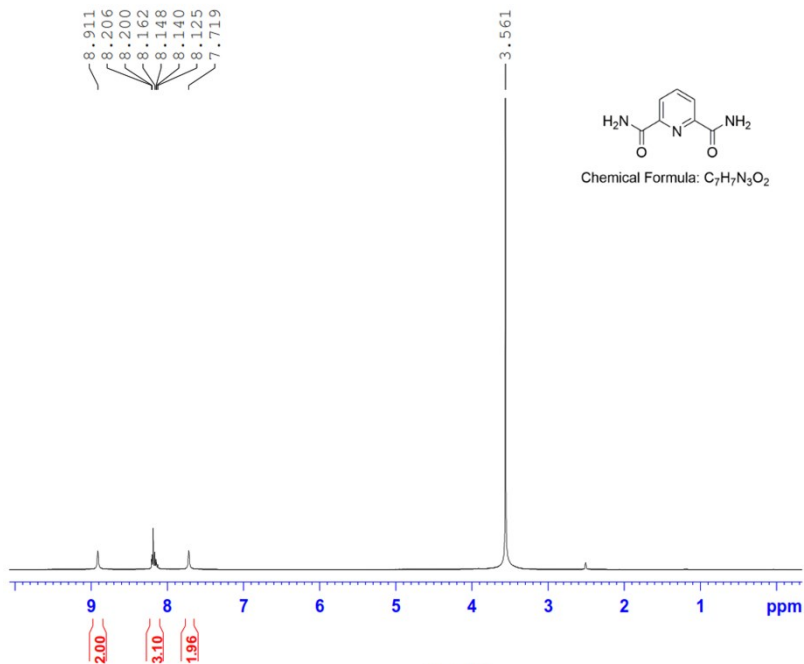

Current Data Parameters  
NAME Dr.MAP141017  
EXPNO 1  
PROCNO 1

F2 - Acquisition Parameters  
Date\_ 20171015  
Time 21.22 h  
INSTRUM spect  
PROBHD Z108618\_0505 ( )  
PULPROG zg30  
TD 65536  
SOLVENT DMSO  
NS 16  
DS 2  
SWH 8012.820 Hz  
FIDRES 0.244532 Hz  
AQ 4.0894465 sec  
RG 35.49  
DW 62.400 usec  
DE 6.50 usec  
TE 299.3 K  
D1 1.00000000 sec  
TDO 1  
SFO1 400.2604716 MHz  
NUC1 1H  
P1 14.25 usec  
PLW1 14.00000000 W

F2 - Processing parameters  
SI 65536  
SF 400.2580000 MHz  
WDW EM  
SSB 0  
LB 0.30 Hz  
GB 0  
PC 1.00

$^1H$  NMR spectrum of pyridine-2,6-dicarboxamide (3)

Signature SIF VIT VELLORE  
T12

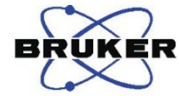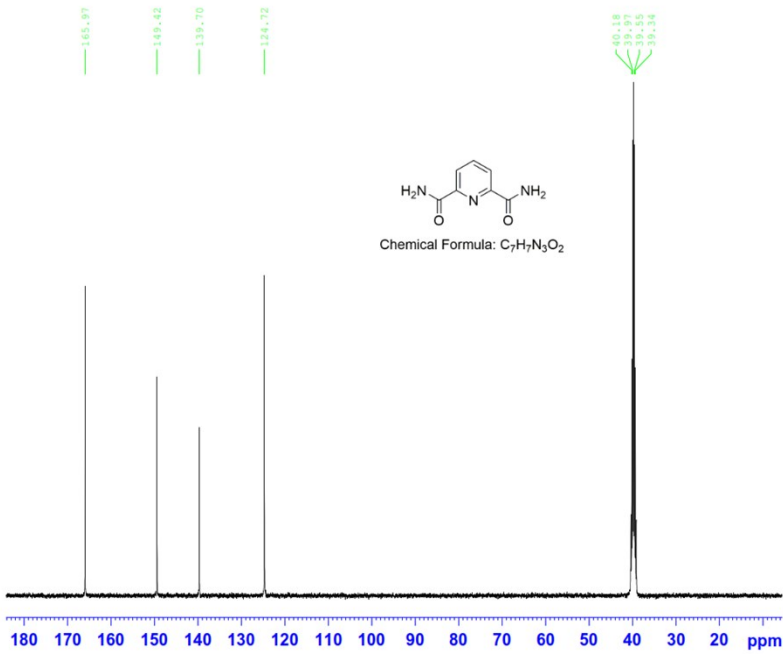

Current Data Parameters  
NAME Dr.MAF141017  
EXPNO 2  
PROCNO 1

F2 - Acquisition Parameters  
Date\_ 20171015  
Time\_ 21.52 h  
INSTRUM spect  
PROBHD z108618\_0505 ( )  
PULPROG zgpg30  
TD 65536  
SOLVENT DMSO  
NS 512  
DS 4  
SWH 24038.461 Hz  
FIDRES 0.733596 Hz  
AQ 1.3631488 sec  
RG 143.73  
DW 20.800 usec  
DE 6.50 usec  
TE 299.3 K  
D1 2.0000000 sec  
D11 0.0300000 sec  
TDO 1  
SFO1 100.6550186 MHz  
NUC1 13C  
P1 9.80 usec  
PLW1 58.0000000 W  
SFO2 400.2596010 MHz  
NUC2 1H  
CPDPRG2 waltz16  
PCPD2 90.00 usec  
PLW2 14.0000000 W  
PLW12 0.35097000 W  
PLW13 0.17654000 W

F2 - Processing parameters  
SI 32768  
SF 100.6449542 MHz  
WDW EM  
SSB 0  
LB 1.00 Hz  
GB 0  
PC 1.40

$^{13}C$  NMR spectrum of pyridine-2,6-dicarboxamide (3)

Signature SIF VIT VELLORE  
T13

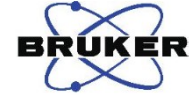

8.120  
8.099  
8.080  
7.962  
7.942  
7.278

1.660  
1.254

0.074  
-0.000

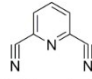

Chemical Formula: C<sub>7</sub>H<sub>3</sub>N<sub>3</sub>

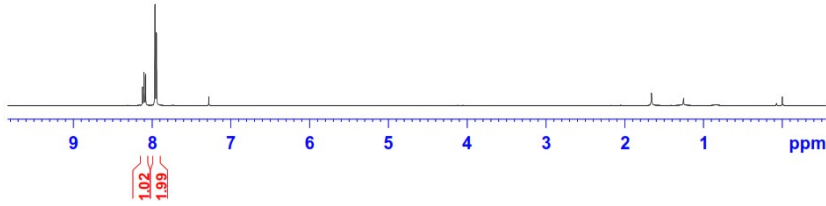

Current Data Parameters  
NAME Dr.SYN281217  
EXPNO 15  
PROCNO 1

F2 - Acquisition Parameters  
Date\_ 20171229  
Time 4.01 h  
INSTRUM spect  
PROBHD z108618\_0505 ( )  
PULPROG zg30  
TD 65536  
SOLVENT CDCl3  
NS 16  
DS 2  
SWH 8012.820 Hz  
FIDRES 0.244532 Hz  
AQ 4.0894465 sec  
RG 156.91  
DW 62.400 usec  
DE 6.50 usec  
TE 298.4 K  
D1 1.00000000 sec  
TDO 1  
SF01 400.2604716 MHz  
NUC1 1H  
P1 14.25 usec  
PLW1 14.00000000 W

F2 - Processing parameters  
SI 65536  
SF 400.2580022 MHz  
WDW EM  
SSB 0  
LB 0.30 Hz  
GB 0  
PC 1.00

<sup>1</sup>H NMR spectrum of pyridine-2,6-dicarbonitrile (4)

Signature SIF VIT VELLORE  
T13

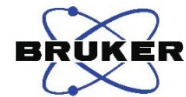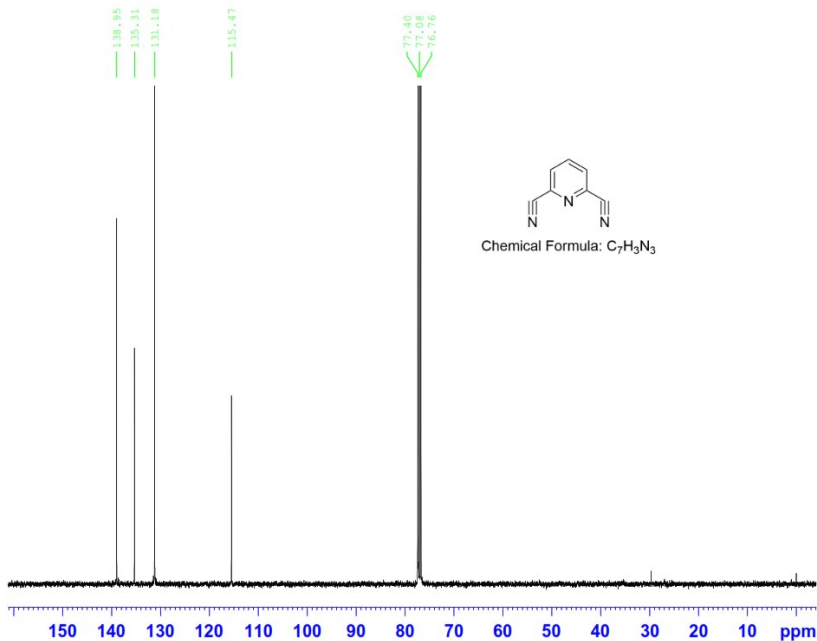

Current Data Parameters  
NAME Dr.SYN281217  
EXPNO 16  
PROCNO 1

F2 - Acquisition Parameters  
Date\_ 20171229  
Time 4.31 h  
INSTRUM spect  
PROBHD Z108618\_0505 (  
PULPROG zgpg30  
TD 65536  
SOLVENT cdcl3  
NS 512  
DS 4  
SWH 24038.461 Hz  
FIDRES 0.733596 Hz  
AQ 1.363188 sec  
RG 143.73  
DW 20.800 usec  
DE 6.50 usec  
TE 298.8 K  
D1 2.0000000 sec  
D11 0.0300000 sec  
TD0 1  
SFO1 100.6550186 MHz  
NUC1 13c  
F1 9.80 usec  
PLW1 58.0000000 W  
SFO2 400.2596010 MHz  
NUC2 1h  
PCPD2 waltz16  
PCPD2 90.00 usec  
PLW2 14.0000000 W  
PLW12 0.35097000 W  
PLW13 0.17654000 W

F2 - Processing parameters  
SI 32768  
SF 100.6449542 MHz  
WDW EM  
SSB 0  
LB 1.00 Hz  
GB 0  
PC 1.40

$^{13}C$  NMR spectrum of pyridine-2,6-dicarbonitrile (4)

Signature SIF VIT VELLORE  
T14

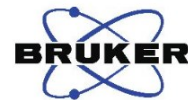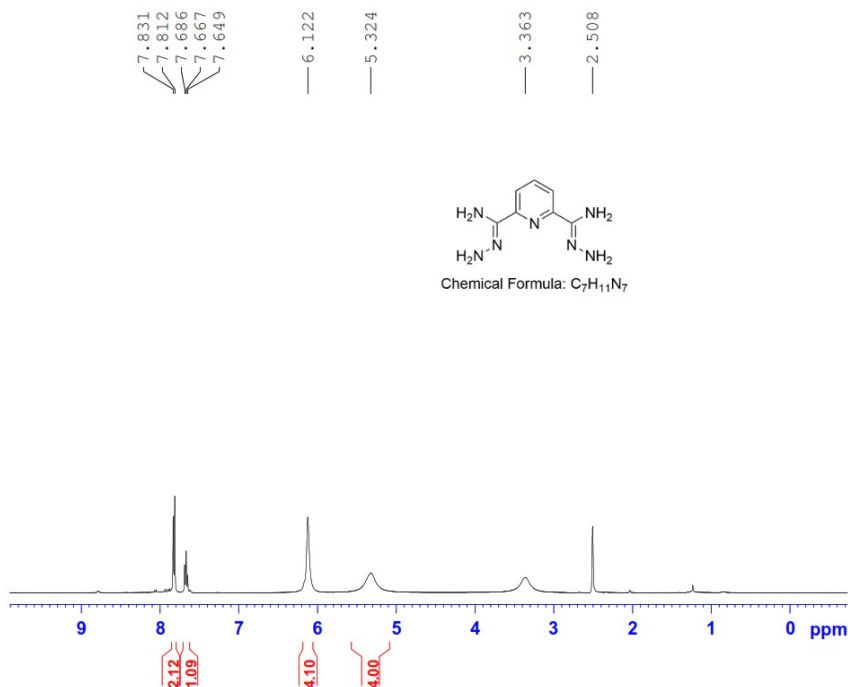

Current Data Parameters  
NAME Desktop  
EXPNO 43  
PROCNO 1

F2 - Acquisition Parameters  
Date\_ 20180224  
Time 11.51 h  
INSTRUM spect  
PROBHD Z108618\_0505 (  
PULPROG zg30  
TD 65536  
SOLVENT DMSO  
NS 16  
DS 2  
SWH 8012.820 Hz  
FIDRES 0.244532 Hz  
AQ 4.0894465 sec  
RG 156.91  
DW 62.400 usec  
DE 6.50 usec  
TE 296.8 K  
D1 1.0000000 sec  
TD0 1  
SFO1 400.2604716 MHz  
NUC1 1h  
F1 14.25 usec  
PLW1 14.0000000 W

F2 - Processing parameters  
SI 65536  
SF 400.2580000 MHz  
WDW EM  
SSB 0  
LB 0.30 Hz  
GB 0  
PC 1.00

$^1H$  NMR spectrum of pyridine-2,6-dicarbohydrazonamide (5)

Signature SIF VIT VELLORE  
T14

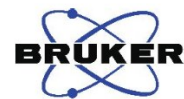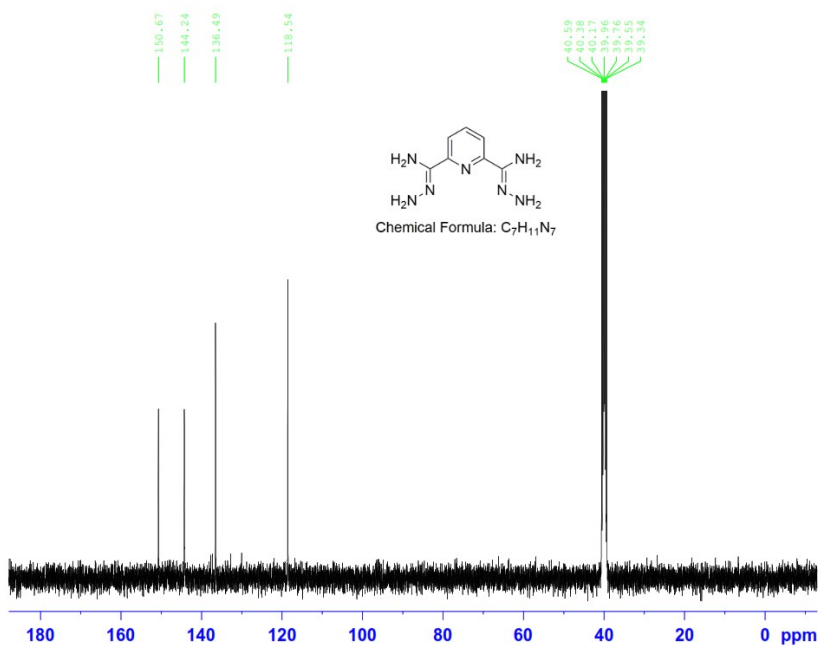

Current Data Parameters  
NAME Desktop  
EXPNO 44  
PROCNO 1

F2 - Acquisition Parameters  
Date\_ 20180224  
Time 12.21 h  
INSTRUM spect  
PROBHD Z108618\_0505 ( )  
PULPROG zgpg30  
TD 65536  
SOLVENT DMSO  
NS 512  
DS 4  
SWH 24038.461 Hz  
FIDRES 0.733596 Hz  
AQ 1.3631488 sec  
RG 143.73  
DW 20.800 usec  
DE 6.50 usec  
TE 297.4 K  
D1 2.0000000 sec  
D11 0.0300000 sec  
TDO 1  
SFO1 100.6550186 MHz  
NUC1 13C  
P1 9.80 usec  
PLW1 58.0000000 W  
SFO2 400.2596010 MHz  
NUC2 1H  
CPDPRG2 waltz16  
PCPD2 90.00 usec  
PLW2 14.0000000 W  
PLW12 0.35097000 W  
PLW13 0.17654000 W

F2 - Processing parameters  
SI 32768  
SF 100.6449542 MHz  
WDW EM  
SSB 0  
LB 1.00 Hz  
GB 0  
FC 1.40

<sup>13</sup>C NMR spectrum of pyridine-2,6-dicarbohydrazonamide (5)



Signature SIF VIT VELLORE  
T25

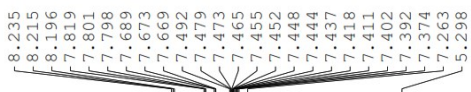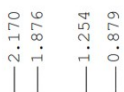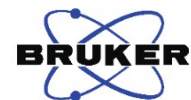

Current Data Parameters  
NAME Desktop  
EXPNO 35  
PROCNO 1

F2 - Acquisition Parameters  
Date\_ 20180318  
Time 15.07 h  
INSTRUM spect  
PROBHD Z108618\_0505 ( )  
PULPROG zg30  
TD 65536  
SOLVENT CDCl3  
NS 16  
DS 2  
SWH 8012.820 Hz  
FIDRES 0.244532 Hz  
AQ 4.0894465 sec  
RG 199.6  
DW 62.400 usec  
DE 6.50 usec  
TE 299.3 K  
D1 1.00000000 sec  
TDO 1  
SFO1 400.2604716 MHz  
NUC1 1H  
P1 14.25 usec  
PLW1 14.00000000 W

F2 - Processing parameters  
SI 65536  
SF 400.2580087 MHz  
WDW EM  
SSB 0  
LB 0.30 Hz  
GB 0  
PC 1.00

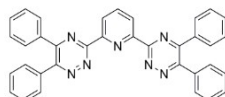

Chemical Formula: C<sub>33</sub>H<sub>23</sub>N<sub>7</sub>

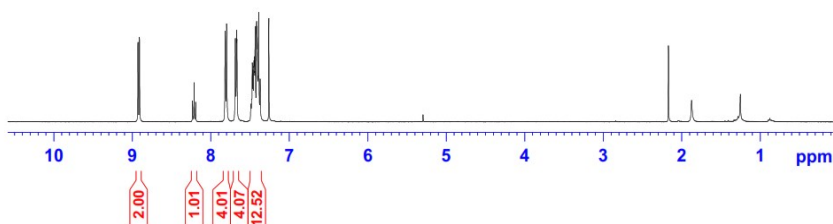

<sup>1</sup>H NMR spectrum of Synthesis of 2,6-bis(5,6-diphenyl-1,2,4-triazin-3-yl) pyridine (6)

Signature SIF VIT VELLORE  
T25

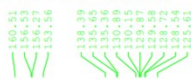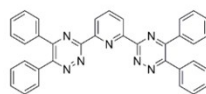

Chemical Formula: C<sub>33</sub>H<sub>23</sub>N<sub>7</sub>

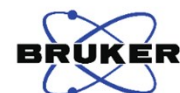

Current Data Parameters  
NAME Desktop  
EXPNO 36  
PROCNO 1

F2 - Acquisition Parameters  
Date\_ 20180318  
Time 15.37 h  
INSTRUM spect  
PROBHD Z108618\_0505 ( )  
PULPROG zgpg30  
TD 65536  
SOLVENT CDCl3  
NS 512  
DS 4  
SWH 24038.461 Hz  
FIDRES 0.733596 Hz  
AQ 1.3631488 sec  
RG 156.91  
DW 20.800 usec  
DE 6.50 usec  
TE 299.6 K  
D1 2.00000000 sec  
D11 0.03000000 sec  
TDO 1  
SFO1 100.6550186 MHz  
NUC1 13C  
P1 9.80 usec  
PLW1 58.00000000 W  
SFO2 400.2596010 MHz  
NUC2 1H  
CPDPRG2 waltz16  
PCPD2 90.00 usec  
PLW2 14.00000000 W  
PLW12 0.35097000 W  
PLW13 0.17654000 W

F2 - Processing parameters  
SI 32768  
SF 100.6449542 MHz  
WDW EM  
SSB 0  
LB 1.00 Hz  
GB 0  
PC 1.40

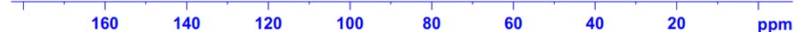

<sup>13</sup>C NMR spectrum of Synthesis of 2,6-bis(5,6-diphenyl-1,2,4-triazin-3-yl) pyridine (6)

Signature SIF VIT VELLORE  
TBTPCLI

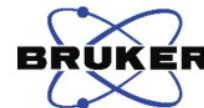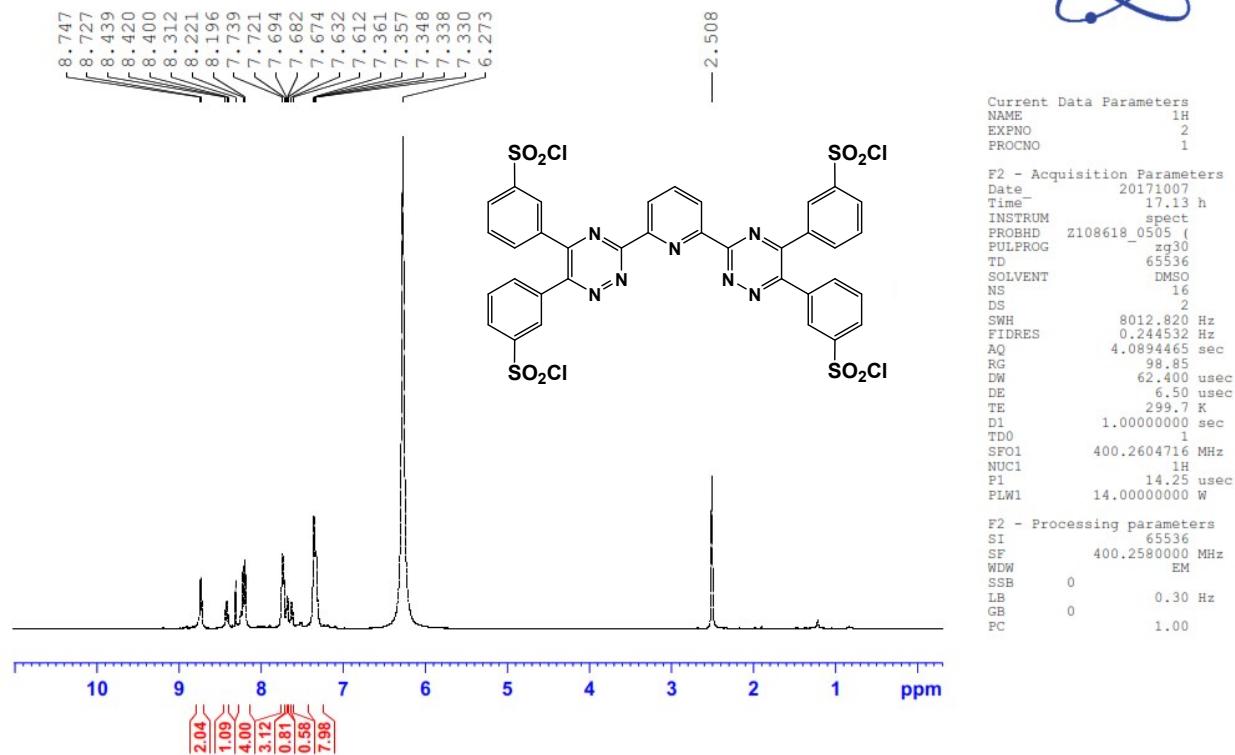

<sup>1</sup>H-NMR spectrum of 3,3',3'',3'''-(pyridine-2,6-diylbis(1,2,4-triazine-3,5,6-triyl))tetrabenzenesulfonyl chloride (7)

Signature SIF VIT VELLORE  
TBTPCLI

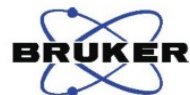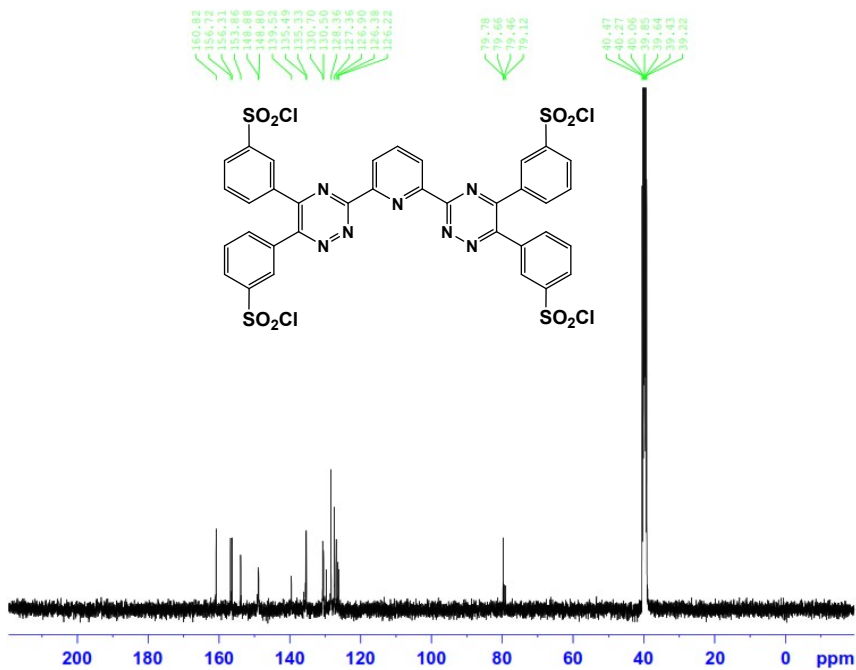

<sup>13</sup>C-NMR spectrum of of 3,3',3''',3''''-(pyridine-2,6-diybis(1,2,4-triazine-3,5,6-triyl))tetrabenzenesulfonyl chloride (7)

Signature SIF VIT VELLORE  
TSBTP

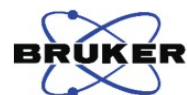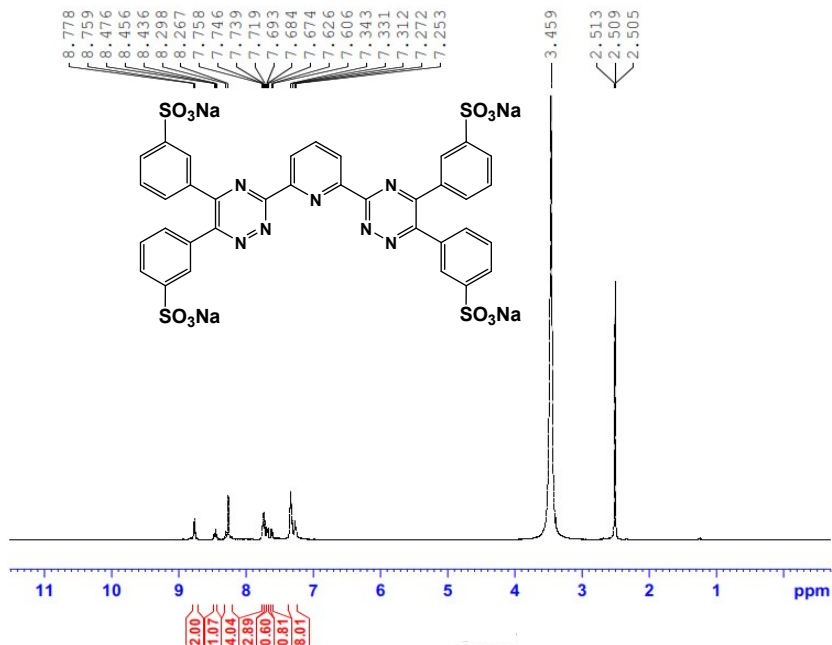

<sup>1</sup>H-NMR spectrum of sodium 3,3',3''',3''''-(pyridine-2,6-diybis(1,2,4-triazine-3,5,6-triyl))tetra benzenesulfonate, SO<sub>3</sub>PhBTP (8)

Signature SIF VIT VELLORE  
TSBTP

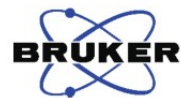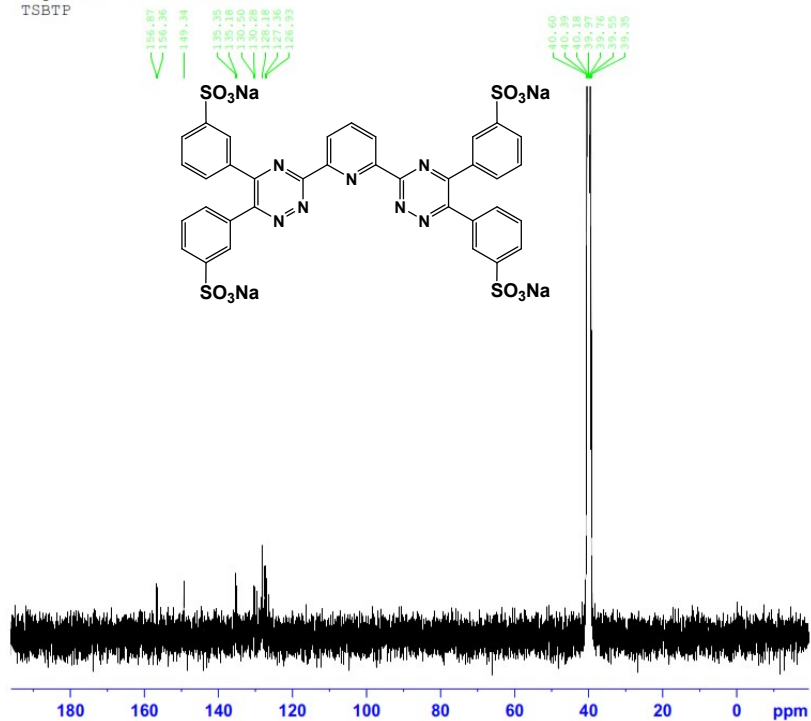

Current Data Parameters  
NAME 13C  
EXPNO 5  
PROCNO 1

F2 - Acquisition Parameters  
Date\_ 20171007  
Time\_ 19.15 h  
INSTRUM spect  
PROBHD z108618\_0505 ( )  
PULPROG zgpg30  
TD 65536  
SOLVENT DMSO  
NS 1024  
DS 4  
SWH 24038.461 Hz  
FIDRES 0.733596 Hz  
AQ 1.3631488 sec  
RG 199.6  
DW 20.800 usec  
DE 6.50 usec  
TE 299.8 K  
D1 2.0000000 sec  
D11 0.0300000 sec  
TDO 1  
SFO1 100.6550186 MHz  
NUC1 13C  
P1 9.80 usec  
PLW1 58.0000000 W  
SFO2 400.2596010 MHz  
NUC2 1H  
CPDPRG[2] waltz16  
PCPD2 90.00 usec  
PLW2 14.0000000 W  
PLW12 0.35097000 W  
PLW13 0.17654000 W

F2 - Processing parameters  
SI 32768  
SF 100.6449542 MHz  
WDW EM  
SSB 0  
LB 1.00 Hz  
GB 0  
PC 1.40

<sup>13</sup>C-NMR spectrum of sodium 3,3',3'',3'''-(pyridine-2,6-diylbis(1,2,4-triazine-3,5,6-triyl))tetra benzenesulfonate, SO<sub>3</sub>PhBTP (8)

Signature SIF VIT VELLORE  
BPDO

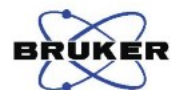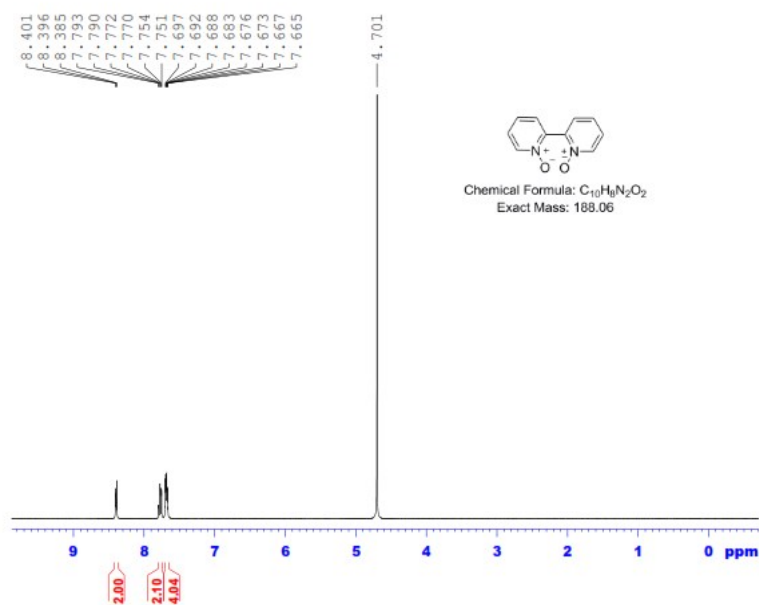

Current Data Parameters  
NAME Dr.SVM141017  
EXPNO 13  
PROCNO 1

F2 - Acquisition Parameters  
Date\_ 20171015  
Time 17.31 h  
INSTRUM spect  
PROBHD z108618\_0505 (   
PULPROG zg30  
TD 65536  
SOLVENT d2o  
NS 16  
DS 2  
SWH 8012.820 Hz  
FIDRES 0.244532 Hz  
AQ 4.0894465 sec  
RG 175.97  
DW 62.400 usec  
DE 6.50 usec  
TE 300.1 K  
D1 1.00000000 sec  
TD0 1  
SFO1 400.2604716 MHz  
NUC1 1h  
F1 14.25 usec  
FLW1 14.00000000 W

F2 - Processing parameters  
SI 65536  
SF 400.2580000 MHz  
WDW EM  
SSB 0  
LB 0.30 Hz  
GB 0  
PC 1.00

$^1\text{H-NMR}$  spectrum of bipyridine N- oxide (10)

Signature SIF VIT VELLORE  
T41

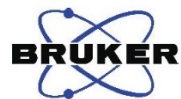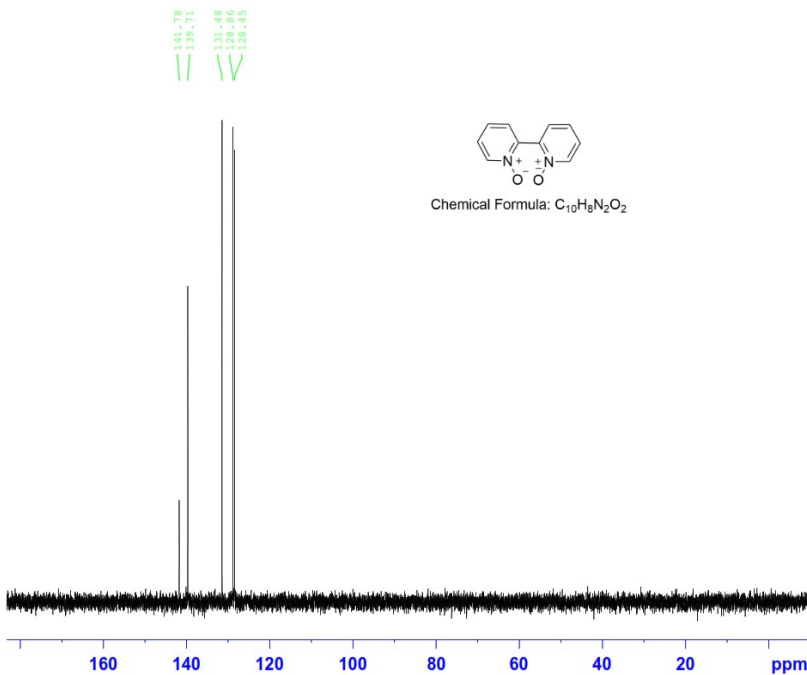

Current Data Parameters  
NAME Dr.SYN141017  
EXPNO 14  
PROCNO 1

F2 - Acquisition Parameters  
Date\_ 20171015  
Time 18.02 h  
INSTRUM spect  
PROBHD Z108618\_0505 ( )  
PULPROG zgpg30  
TD 65536  
SOLVENT D2O  
NS 512  
DS 4  
SWH 24038.461 Hz  
FIDRES 0.733596 Hz  
AQ 1.3631488 sec  
RG 88.69  
DW 20.800 usec  
DE 6.50 usec  
TE 299.8 K  
D1 2.0000000 sec  
D11 0.0300000 sec  
TD0 1  
SFO1 100.6550186 MHz  
NUC1 13C  
PI 9.80 usec  
PLW1 58.0000000 W  
SFO2 400.2596010 MHz  
NUC2 1H  
CPDPRG2 waltz16  
PCPD2 90.00 usec  
PLW2 14.0000000 W  
PLW12 0.35097000 W  
PLW13 0.17654000 W

F2 - Processing parameters  
SI 32768  
SF 100.6449542 MHz  
WDW EM  
SSB 0  
LB 1.00 Hz  
GB 0  
PC 1.40

<sup>13</sup>C-NMR spectrum of bipyridine N- oxide (10)

Signature SIF VIT VELLORE  
T42

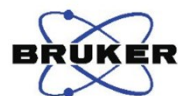

8.738  
8.717  
8.049  
8.029  
8.009  
7.793  
7.774  
7.265

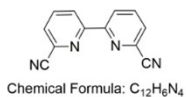

Current Data Parameters  
NAME NMR DATA  
EXPNO 37  
PROCNO 1

F2 - Acquisition Parameters  
Date\_ 20180223  
Time 16.12 h  
INSTRUM spect  
PROBHD z108618\_0505 (4  
PULPROG zg30  
TD 65536  
SOLVENT CDCl3  
NS 16  
DS 2  
SWH 8012.820 Hz  
FIDRES 0.244532 Hz  
AQ 4.0894465 sec  
RG 199.6  
DW 62.400 usec  
DE 6.50 usec  
TE 296.4 K  
D1 1.00000000 sec  
TD0 1  
SFO1 400.2604716 MHz  
NUC1 1H  
P1 14.25 usec  
PLW1 14.00000000 W

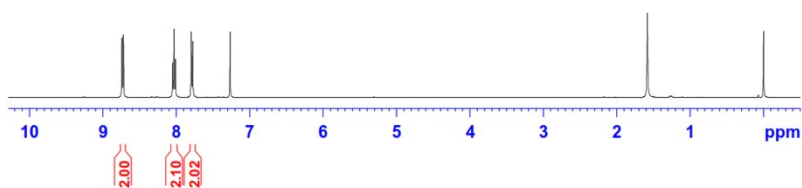

F2 - Processing parameters  
SI 65536  
SF 400.2580080 MHz  
WDW EM  
SSB 0  
LB 0.30 Hz  
GB 0  
PC 1.00

<sup>1</sup>H-NMR spectrum of [2,2'-Bipyridine-6,6'-dicyanide] (11)

Signature SIF VIT VELLORE  
T42

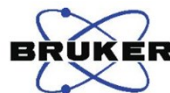

155.54  
138.43  
133.41  
129.11  
124.68  
117.66

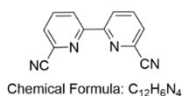

Current Data Parameters  
NAME NMR DATA  
EXPNO 38  
PROCNO 1

F2 - Acquisition Parameters  
Date\_ 20180223  
Time 16.41 h  
INSTRUM spect  
PROBHD z108618\_0505 (4  
PULPROG zgpg30  
TD 65536  
SOLVENT CDCl3  
NS 512  
DS 4  
SWH 24038.461 Hz  
FIDRES 0.733596 Hz  
AQ 1.3631488 sec  
RG 199.6  
DW 20.800 usec  
DE 6.50 usec  
TE 297.1 K  
D1 2.00000000 sec  
D11 0.03000000 sec  
TD0 1  
SFO1 100.6550186 MHz  
NUC1 13C  
P1 9.60 usec  
PLW1 58.00000000 W  
SFO2 400.2596010 MHz  
NUC2 1H  
CPDPRG[2] waltz16  
PCPD 90.00 usec  
PLW2 14.00000000 W  
PLW12 0.35097000 W  
PLW13 0.17654000 W

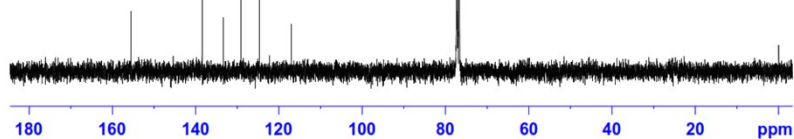

F2 - Processing parameters  
SI 32768  
SF 100.6449542 MHz  
WDW EM  
SSB 0  
LB 1.00 Hz  
GB 0  
PC 1.40

<sup>13</sup>C-NMR spectrum of [2,2'-Bipyridine-6,6'-dicyanide] (11)

Signature SIF VIT VELLORE  
T43

8.912  
8.893  
8.795  
8.776  
8.653  
8.634  
8.500  
8.017  
7.997  
7.977  
7.944  
7.938  
7.925  
7.918  
7.906  
7.899  
7.759  
6.136  
5.598  
3.354  
2.508

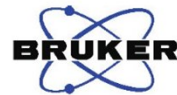

Current Data Parameters  
NAME New folder  
EXPNO 39  
PROCNO 1

F2 - Acquisition Parameters  
Date\_ 20180223  
Time\_ 16.46 h  
INSTRUM spect  
PROBHD z108618\_0505 ( )  
PULPROG zg30  
TD 65536  
SOLVENT DMSO  
NS 16  
DS 2  
SWH 8012.820 Hz  
FIDRES 0.244532 Hz  
AQ 4.0894465 sec  
RG 199.6  
DW 62.400 usec  
DE 6.50 usec  
TE 296.5 K  
D1 1.00000000 sec  
TDO 1  
SF01 400.2604716 MHz  
NUC1 1H  
P1 14.25 usec  
PLW1 14.00000000 W

F2 - Processing parameters  
SI 65536  
SF 400.2580000 MHz  
WDW EM  
SSB 0  
LB 0.30 Hz  
GB 0  
PC 1.00

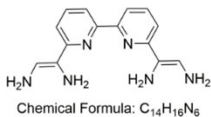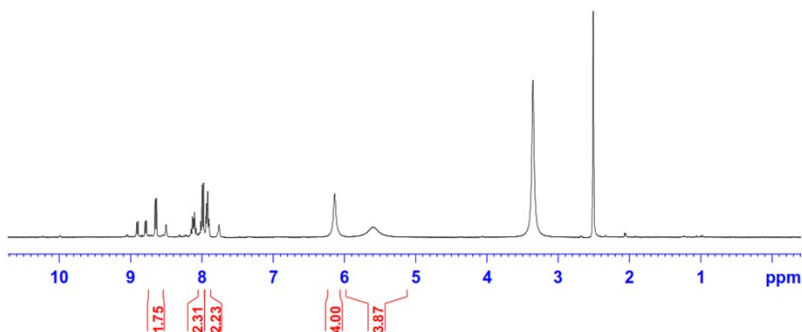

<sup>1</sup>H-NMR spectrum of 2,2'-Bipyridine-6,6'-dicarbohydrazonamide (12)



Signature SIF VIT VELLORE  
T45

8.746  
8.162  
8.142  
8.122  
7.781  
7.763  
7.760  
7.699  
7.682  
7.678  
7.491  
7.486  
7.473  
7.469  
7.461  
7.451  
7.446  
7.439  
7.422  
7.418  
7.405  
7.400  
7.262

— 1.618  
— 1.254

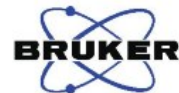

Current Data Parameters  
NAME Dr.MAF280518  
EXPNO 49  
PROCNO 1

F2 - Acquisition Parameters  
Date\_ 20180528  
Time 12.50 h  
INSTRUM spect  
PROBHD z108618\_0505 (4  
PULPROG zg30  
TD 65536  
SOLVENT CDCl3  
NS 16  
DS 2  
SWH 8012.820 Hz  
FIDRES 0.244532 Hz  
AQ 4.0894465 sec  
RG 199.6  
DW 62.400 usec  
DE 6.50 usec  
TE 299.3 K  
D1 1.00000000 sec  
TD0 1  
SFO1 400.2604716 MHz  
NUC1 1H  
P1 14.27 usec  
PLW1 15.00000000 W

F2 - Processing parameters  
SI 65536  
SF 400.2580085 MHz  
WDW EM  
SSB 0  
LB 0.30 Hz  
GB 0  
PC 1.00

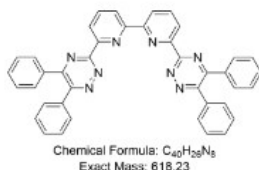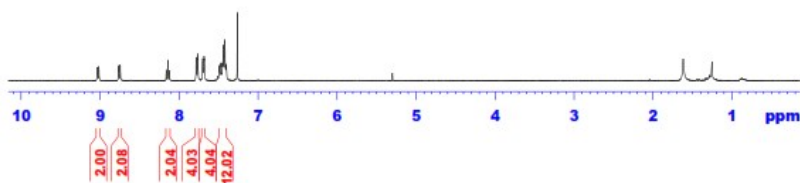

$^1\text{H-NMR}$  spectrum of 6,6'-Bis(5,6-diphenyl-1,2,4-triazin-3-yl)-2,2'-bipyridine (13)

Signature SIF VIT VELLORE  
T45

160.77  
156.27  
156.03  
152.25  
138.15  
135.75  
130.89  
130.01  
129.84  
129.60  
128.70  
128.64  
127.46

77.24  
77.00  
76.70

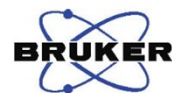

Current Data Parameters  
NAME Dr.MAF280518  
EXPNO 50  
PROCNO 1

F2 - Acquisition Parameters  
Date\_ 20180528  
Time 13.20 h  
INSTRUM spect  
PROBHD z108618\_0505 (4  
PULPROG zgpg30  
TD 65536  
SOLVENT CDCl3  
NS 512  
DS 4  
SWH 24038.461 Hz  
FIDRES 0.733596 Hz  
AQ 1.363188 sec  
RG 199.6  
DW 20.800 usec  
DE 6.50 usec  
TE 299.3 K  
D1 2.00000000 sec  
D11 0.03000000 sec  
TD0 1  
SFO1 100.6550186 MHz  
NUC1 13C  
P1 9.80 usec  
PLW1 58.00000000 W  
SFO2 400.2596010 MHz  
NUC2 1H  
CPDPRG2 waltz16  
FCFD2 90.00 usec  
PLW2 15.00000000 W  
PLW12 0.37709999 W  
PLW13 0.18968000 W

F2 - Processing parameters  
SI 32768  
SF 100.6449542 MHz  
WDW EM  
SSB 0  
LB 1.00 Hz  
GB 0  
PC 1.40

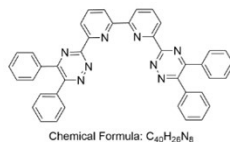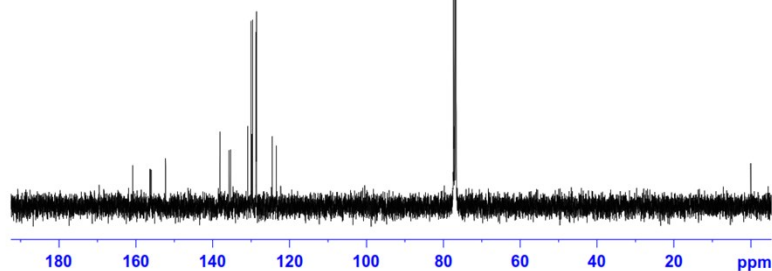

$^{13}\text{C-NMR}$  spectrum of 6,6'-Bis(5,6-diphenyl-1,2,4-triazin-3-yl)-2,2'-bipyridine (13)

Signature SIF VIT VELLORE  
T4-CL

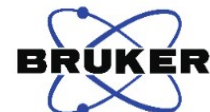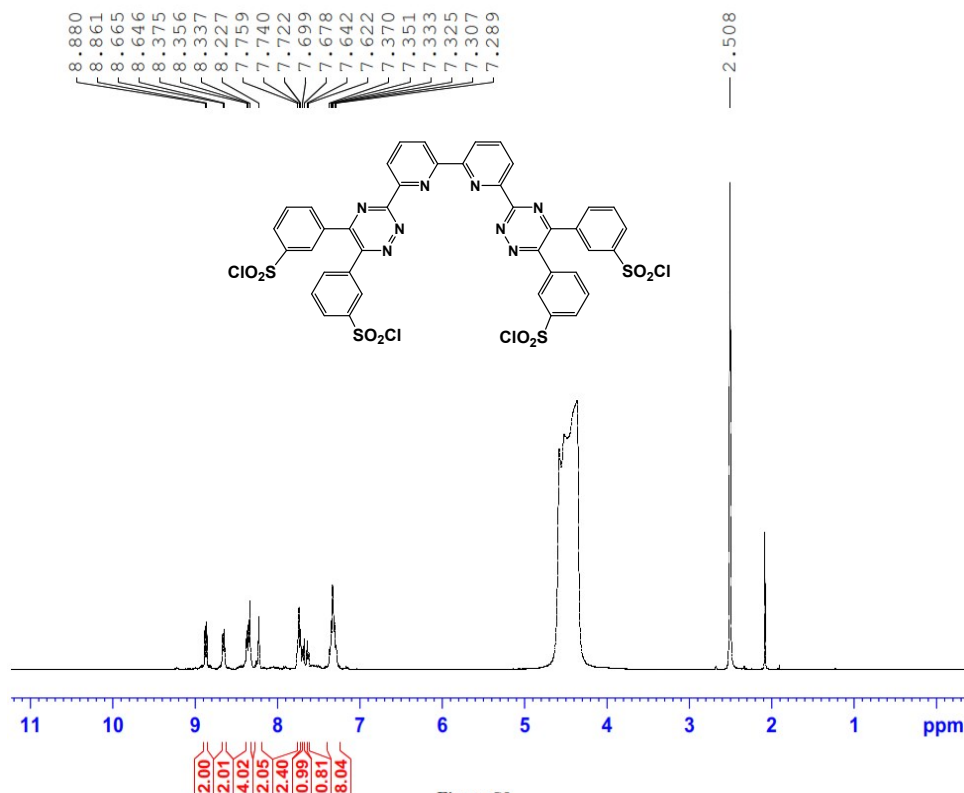

Current Data Parameters

NAME 1H  
EXPNO 97  
PROCNO 1

F2 - Acquisition Parameters

Date\_ 20181221  
Time\_ 11.08 h  
INSTRUM spect  
PROBHD Z108618\_0505 ( )  
PULPROG zg30  
TD 65536  
SOLVENT DMSO  
NS 16  
DS 2  
SWH 8012.820 Hz  
FIDRES 0.244532 Hz  
AQ 4.0894465 sec  
RG 112.69  
DW 62.400 usec  
DE 6.50 usec  
TE 296.4 K  
D1 1.00000000 sec  
TDO 1  
SFO1 400.2604716 MHz  
NUC1 1H  
P1 14.00 usec  
PLW1 16.00000000 W

F2 - Processing parameters

SI 65536  
SF 400.2580000 MHz  
WDW EM  
SSB 0  
LB 0.30 Hz  
GB 0  
PC 1.00

<sup>1</sup>H-NMR spectrum of 3,3',3'',3'''-[3-(2,2'-Bipyridine-6,6'-diyl)-1,2,4-triazine-5,5,6,6-tetrayl]tetrabenzene sulfonyl chloride (14)

Signature SIF VIT VELLORE  
T4-NA

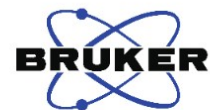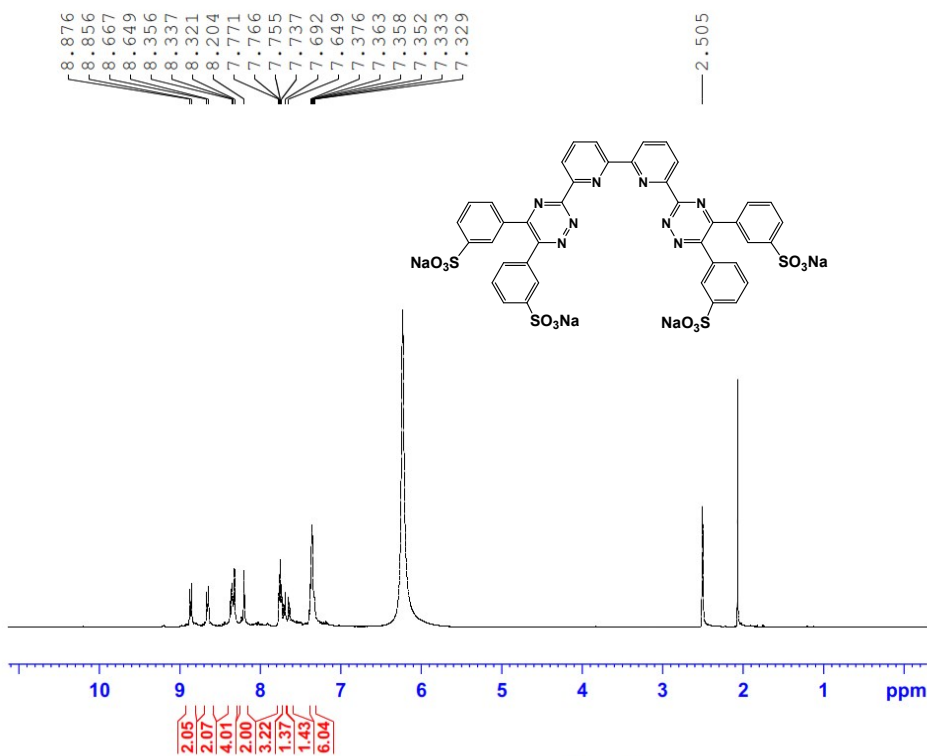

Current Data Parameters  
NAME NMR raw data  
EXPNO 11  
PROCNO 1

F2 - Acquisition Parameters  
Date\_ 20190412  
Time 9.29 h  
INSTRUM spect  
PROBHD Z108618\_0505 (   
PULPROG zg30  
TD 65536  
SOLVENT CDCl3  
NS 16  
DS 2  
SWH 8012.820 Hz  
FIDRES 0.244532 Hz  
AQ 4.0894465 sec  
RG 77.73  
DW 62.400 usec  
DE 6.50 usec  
TE 299.4 K  
D1 1.0000000 sec  
TDO 1  
SFO1 400.2604716 MHz  
NUC1 1H  
P1 14.00 usec  
PLW1 16.0000000 W

F2 - Processing parameters  
SI 65536  
SF 400.2599017 MHz  
WDW EM  
SSB 0  
LB 0.30 Hz  
GB 0  
PC 1.00

<sup>1</sup>H-NMR spectrum of Tetrasodium 3,3',3'',3'''-[3-(2,2'-bipyridine-6,6'-diyl)-1,2,4-Triazine -5,5,6,6- tetrayl] tetra benzenesulfonate (15)

Signature SIF VIT VELLORE  
TA-NA

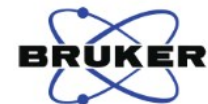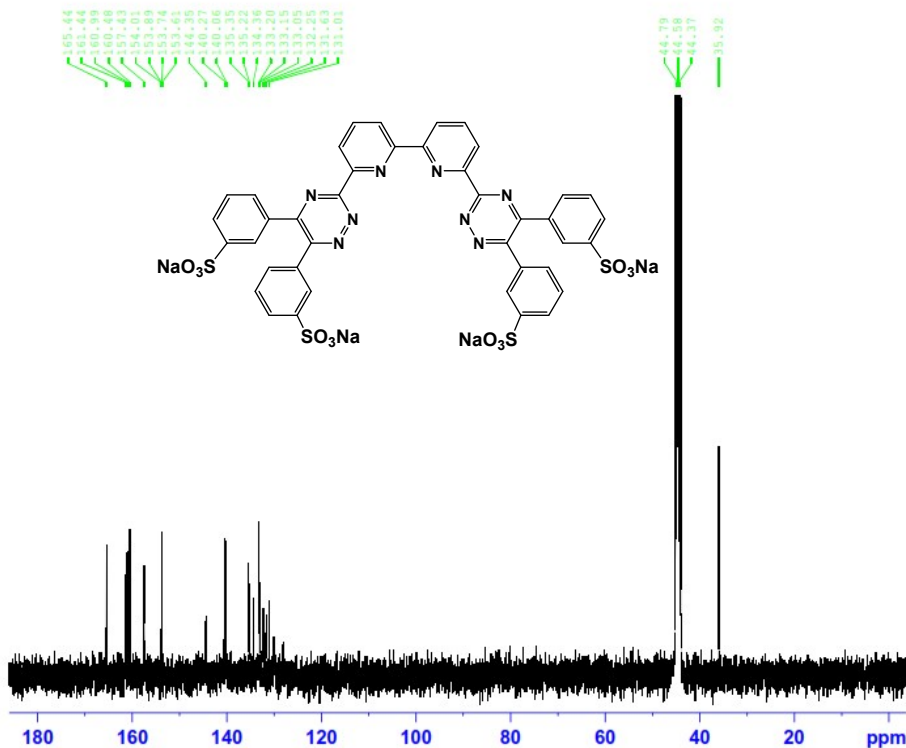

Current Data Parameters  
NAME Dr.SYN120419  
EXPNO 12  
PROCNO 1

F2 - Acquisition Parameters  
Date\_ 20190412  
Time 13.04 h  
INSTRUM spect  
PROBHD Z108618\_0505 ( zpp510  
PULPROG zgpg30  
TD 65536  
SOLVENT CDC13  
NS 512  
DS 4  
SWH 24038.461 Hz  
FIDRES 0.733596 Hz  
AQ 1.3631488 sec  
RG 199.6  
DW 20.800 usec  
DE 6.50 usec  
TE 299.6 K  
D1 2.00000000 sec  
D11 0.03000000 sec  
TDO 1  
SFO1 100.6550186 MHz  
NUC1 13C  
P1 9.80 usec  
PLW1 58.00000000 W  
SFO2 400.2596010 MHz  
NUC2 1H  
CPDPRG2 waltz16  
PCPD2 90.00 usec  
PLW2 16.00000000 W  
PLW12 0.38716000 W  
PLW13 0.19474000 W

F2 - Processing parameters  
SI 32768  
SF 100.6449542 MHz  
WDW EM  
SSB 0  
LB 1.00 Hz  
GB 0  
PC 1.40

<sup>13</sup>C-NMR spectrum of Tetrasodium 3,3',3'',3'''-[3-(2,2'-bipyridine-6,6'-diyl)-1,2,4-Triazine -5,5,6,6- tetrayl] tetra benzenesulfonate (15)

Signature SIF VIT VELLORE  
T61

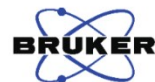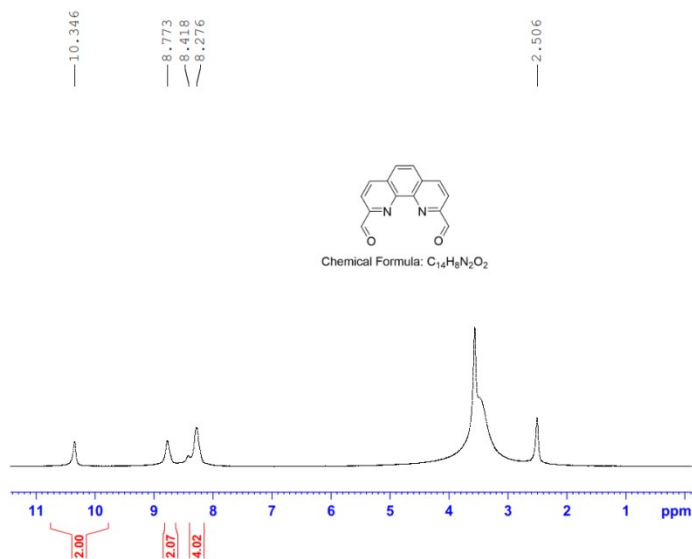

Current Data Parameters  
NAME T6  
EXPNO 12  
PROCNO 1

F2 - Acquisition Parameters  
Date\_ 20171118  
Time 20.39 h  
INSTRUM spect  
PROBHD Z108618\_0505 ( zg30  
PULPROG zgpg30  
TD 65536  
SOLVENT DMSO  
NS 16  
DS 2  
SWH 8012.820 Hz  
FIDRES 0.244532 Hz  
AQ 4.0894465 sec  
RG 98.85  
DW 62.400 usec  
DE 6.50 usec  
TE 298.9 K  
D1 1.00000000 sec  
TDO 1  
SFO1 400.2604716 MHz  
NUC1 1H  
P1 14.25 usec  
PLW1 14.00000000 W

F2 - Processing parameters  
SI 65536  
SF 400.2580000 MHz  
WDW EM  
SSB 0  
LB 0.30 Hz  
GB 0  
PC 1.00

<sup>1</sup>H-NMR spectrum of 1,10-phenanthroline-2,9-dicarbaldehyde (17)

Signature SIF VIT VELLORE  
T61

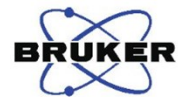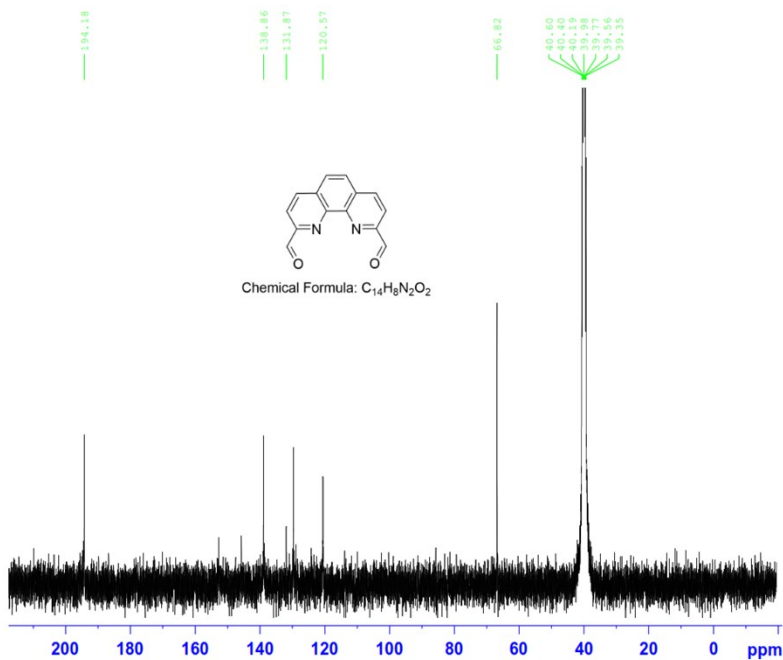

Current Data Parameters  
NAME Desktop  
EXPNO 13  
PROCNO 1

F2 - Acquisition Parameters  
Date\_ 20171118  
Time 21:09 h  
INSTRUM spect  
PROBHD Z108618\_0505 ( )  
PULPROG zgpg30  
TD 65536  
SOLVENT DMSO  
NS 512  
DS 4  
SWH 24038.461 Hz  
FIDRES 0.733596 Hz  
AQ 1.3631488 sec  
RG 156.91  
DW 20.800 usec  
DE 6.50 usec  
TE 301.7 K  
D1 2.0000000 sec  
D11 0.0300000 sec  
TD0 1  
SFO1 100.6550186 MHz  
NUC1 13C  
P1 9.80 usec  
PLW1 58.0000000 W  
SFO2 400.2596010 MHz  
NUC2 1H  
PCPDFG2 waltz16  
PCPD2 90.00 usec  
PLW2 14.0000000 W  
PLW12 0.35097000 W  
PLW13 0.17654000 W

F2 - Processing parameters  
SI 32768  
SF 100.6449542 MHz  
WDW EM  
SSB 0  
LB 1.00 Hz  
GB 0  
PC 1.40

$^{13}C$ -NMR spectrum of 1,10-phenanthroline-2,9-dicarbaldehyde (17)

Signature SIF VIT VELLORE  
T62

8.866  
8.845  
8.441  
8.420  
8.287

2.509

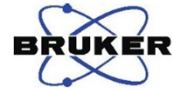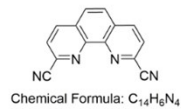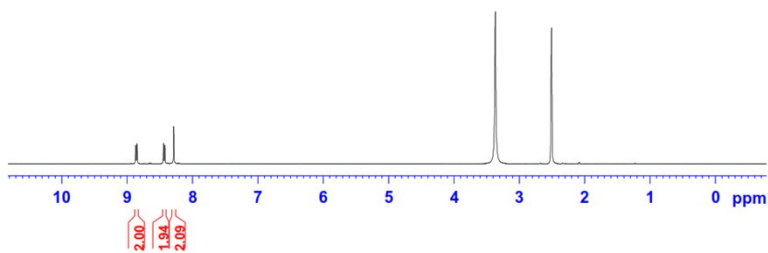

Current Data Parameters  
NAME NMR DATA  
EXPNO 41  
PROCNO 1

F2 - Acquisition Parameters  
Date\_ 20180223  
Time 17.20 h  
INSTRUM spect  
PROBHD Z108618\_0505 ( )  
PULPROG zg30  
TD 65536  
SOLVENT DMSO  
NS 16  
DS 2  
SWH 8012.820 Hz  
FIDRES 0.244532 Hz  
AQ 4.0894465 sec  
RG 199.6  
DW 62.400 usec  
DE 6.50 usec  
TE 296.5 K  
D1 1.00000000 sec  
TDO 1  
SFO1 400.2604716 MHz  
NUC1 1H  
P1 14.25 usec  
PLW1 14.00000000 W

F2 - Processing parameters  
SI 65536  
SF 400.2580000 MHz  
WDW EM  
SSB 0  
LB 0.30 Hz  
GB 0  
PC 1.00

<sup>1</sup>H-NMR spectrum of 1,10-Phenanthroline-2,9- dicarbonitrile (18)

Signature SIF VIT VELLORE  
T62

145.36  
139.19  
133.39  
131.09  
128.08  
118.12

40.60  
40.39  
40.18  
39.76  
39.55  
39.35

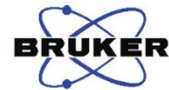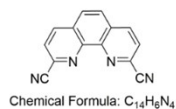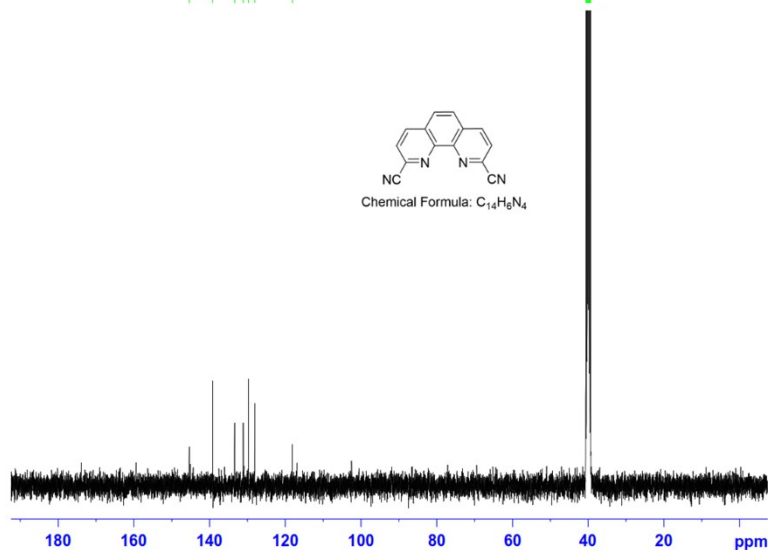

Current Data Parameters  
NAME NMR DATA  
EXPNO 42  
PROCNO 1

F2 - Acquisition Parameters  
Date\_ 20180223  
Time 17.50 h  
INSTRUM spect  
PROBHD Z108618\_0505 ( )  
PULPROG zgpg30  
TD 65536  
SOLVENT DMSO  
NS 512  
DS 4  
SWH 24038.461 Hz  
FIDRES 0.733596 Hz  
AQ 1.3631488 sec  
RG 143.73  
DW 20.800 usec  
DE 6.50 usec  
TE 297.2 K  
D1 2.00000000 sec  
D11 0.03000000 sec  
TDO 1  
SFO1 100.6550186 MHz  
NUC1 13C  
P1 9.80 usec  
PLW1 58.00000000 W  
SFO2 400.2596010 MHz  
NUC2 1H  
CPDPRG2 waltz16  
PCPD2 90.00 usec  
PLW2 14.00000000 W  
PLW12 0.35097000 W  
PLW13 0.17654000 W

F2 - Processing parameters  
SI 32768  
SF 100.6449542 MHz  
WDW EM  
SSB 0  
LB 1.00 Hz  
GB 0  
PC 1.40

# <sup>13</sup>C-NMR spectrum of 1,10-Phenanthroline-2,9-dicarbonitrile (18)

Signature SIF VIT VELLORE  
T63

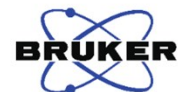

8.393  
8.372  
8.304  
8.282  
7.946  
6.138  
5.645

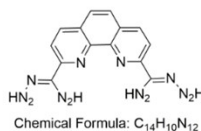

Current Data Parameters  
NAME Dr.SYN130719  
EXPNO 13  
PROCNO 1

F2 - Acquisition Parameters  
Date\_ 20190713  
Time 17.29 h  
INSTRUM spect  
PROBHD Z108618\_0505 (1  
PULPROG zg30  
TD 65536  
SOLVENT DMSO  
NS 16  
DS 2  
SWH 8012.820 Hz  
FIDRES 0.244532 Hz  
AQ 4.0894465 sec  
RG 112.69  
DW 62.400 usec  
DE 6.50 usec  
TE 300.2 K  
D1 1.00000000 sec  
TDO 1  
SFO1 400.2604716 MHz  
NUC1 1H  
P1 14.00 usec  
PLW1 16.00000000 W

F2 - Processing parameters  
SI 65536  
SF 400.2580000 MHz  
WDW EM  
SSB 0  
LB 0.30 Hz  
GB 0  
PC 1.00

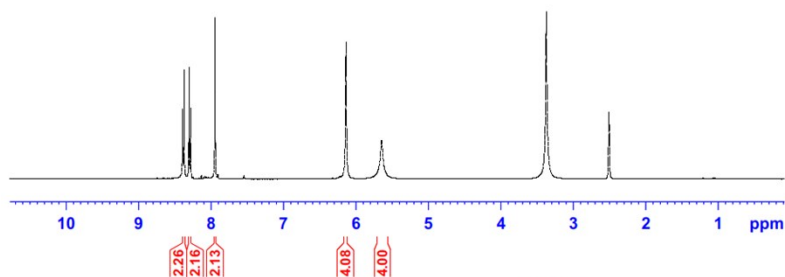

# <sup>1</sup>H-NMR spectrum of 1,10-phenanthroline-2,9-bis(carbohydrazonamide) (19)

Signature SIF VIT VELLORE  
T63

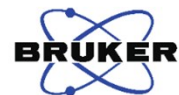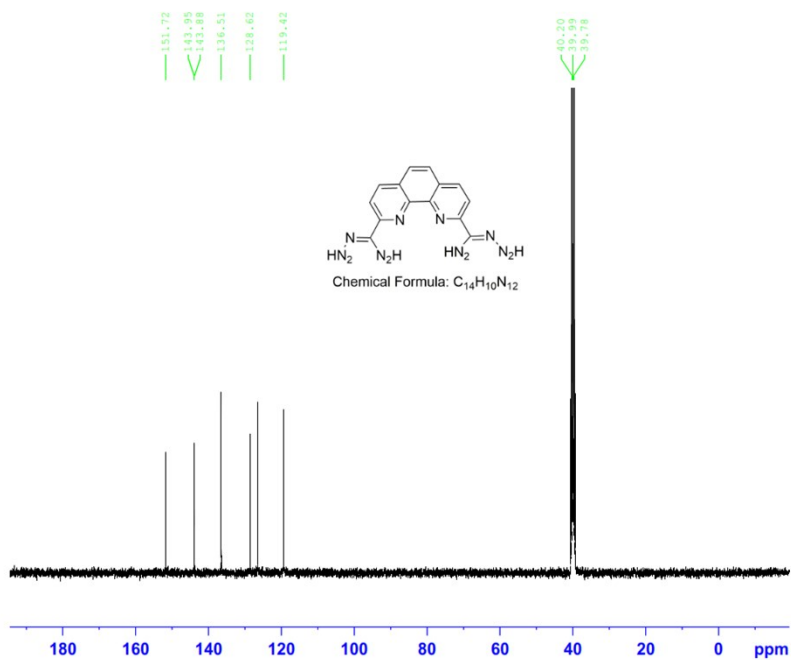

Current Data Parameters  
NAME Dr.SYN130719  
EXPNO 14  
PROCNO 1

F2 - Acquisition Parameters  
Date\_ 20190713  
Time 18.00 h  
INSTRUM spect  
PROBHD Z108618\_0505 ( )  
PULPROG zgpg30  
TD 65536  
SOLVENT DMSO  
NS 512  
DS 4  
SWH 24038.461 Hz  
FIDRES 0.733596 Hz  
AQ 1.3631488 sec  
RG 156.91  
EW 20.800 usec  
DE 6.50 usec  
TE 301.4 K  
D1 2.0000000 sec  
D11 0.0300000 sec  
TDO 1  
SFO1 100.6550186 MHz  
NUC1 13C  
P1 9.80 usec  
PLM1 58.0000000 W  
SFO2 400.2596010 MHz  
NUC2 1H  
CPDPRG[2] waltz16  
PCPD2 90.00 usec  
PLM2 16.0000000 W  
PLW12 0.38716000 W  
PLW13 0.19474000 W

F2 - Processing parameters  
SI 32768  
SF 100.6449542 MHz  
WDW EM  
SSB 0  
LB 1.00 Hz  
GB 0  
PC 1.40

<sup>13</sup>C-NMR spectrum of 1,10-phenanthroline-2,9-bis(carbohydrazonamide) (19)



Signature SIF VIT VELLORE  
T64

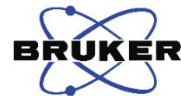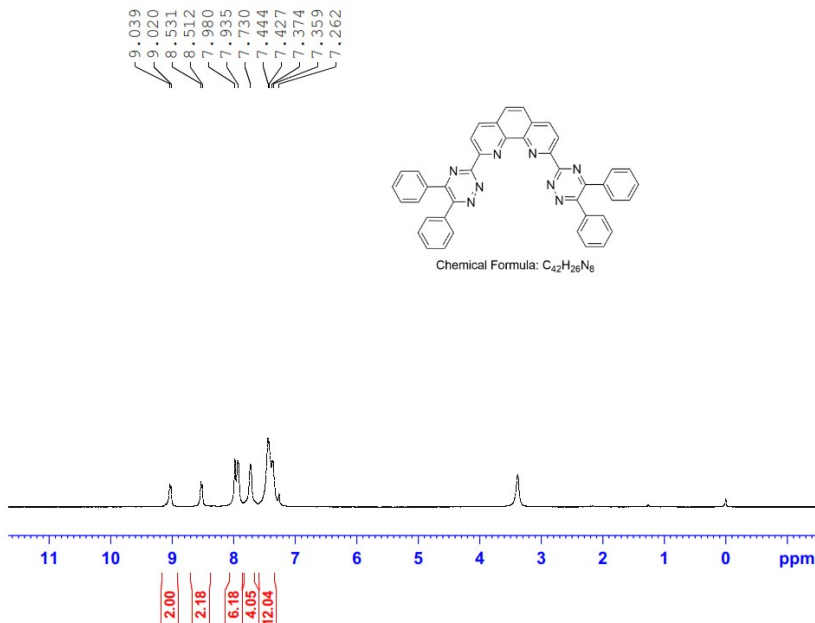

Current Data Parameters  
NAME Dr.SYN010819  
EXNO 92  
PROCNO 1

F2 - Acquisition Parameters  
Date 20190802  
Time 6.38 h  
INSTRUM spect  
PROBHD Z108618\_0505 (  
PULPROG zg30  
TD 65536  
SOLVENT CDCl3  
NS 16  
DS 2  
SWH 8012.820 Hz  
FIDRES 0.244532 Hz  
AQ 4.0894455 sec  
RG 112.69  
DW 62.400 usec  
DE 6.50 usec  
TE 300.5 K  
D1 1.00000000 sec  
TD0 1  
SF01 400.2604716 MHz  
NUC1 1H  
P1 14.00 usec  
PLW1 16.00000000 W

F2 - Processing parameters  
SI 65536  
SF 400.2580091 MHz  
WDW EM  
SSB 0  
LB 0.30 Hz  
GB 0  
PC 1.00

$^1\text{H-NMR}$  spectrum of 9-Bis(5,6-diphenyl-1,2,4-triazin-3-yl)-1,10-phenanthroline (20)

Signature SIF VIT VELLORE  
T64

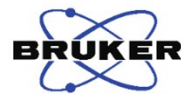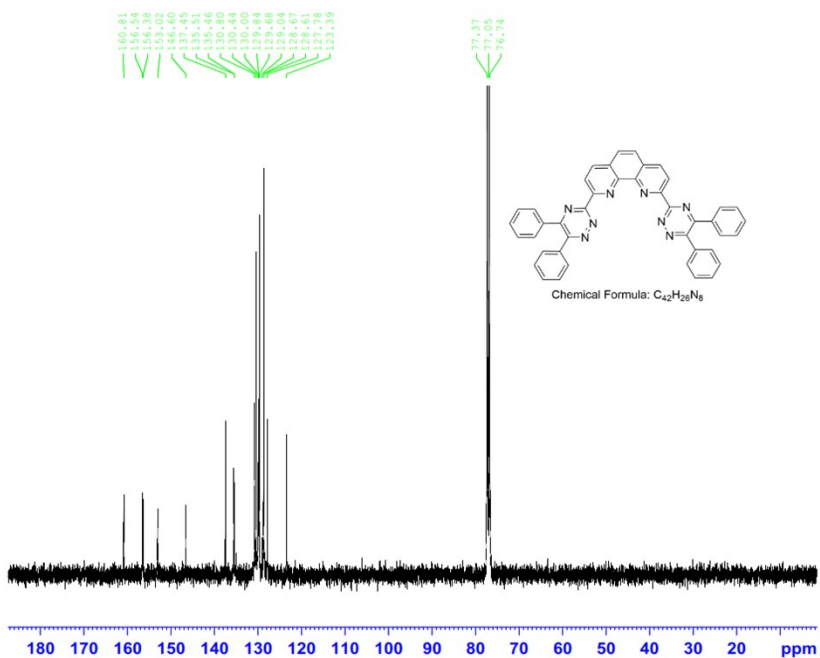

Current Data Parameters  
NAME Dr.SYN010819  
EXNO 93  
PROCNO 1

F2 - Acquisition Parameters  
Date 20190802  
Time 7.09 h  
INSTRUM spect  
PROBHD Z108618\_0505 (  
PULPROG zgpg30  
TD 65536  
SOLVENT CDCl3  
NS 512  
DS 4  
SWH 24038.461 Hz  
FIDRES 0.733596 Hz  
AQ 1.3631498 sec  
RG 199.6  
DW 20.800 usec  
DE 6.50 usec  
TE 300.9 K  
D1 2.00000000 sec  
D11 0.03000000 sec  
TD0 1  
SF01 100.6550186 MHz  
NUC1 13C  
P1 9.80 usec  
PLW1 58.00000000 W  
SF02 400.2596010 MHz  
NUC2 1H  
CPDPRG[2] waltz16  
PCPD2 90.00 usec  
PLW2 16.00000000 W  
PLW12 0.38716000 W  
PLW13 0.19474000 W

F2 - Processing parameters  
SI 32768  
SF 100.6449542 MHz  
WDW EM  
SSB 0  
LB 1.00 Hz  
GB 0  
PC 1.40

$^{13}\text{C-NMR}$  spectrum of 9-Bis(5,6-diphenyl-1,2,4-triazin-3-yl)-1,10-phenanthroline (20)

Signature SIF VIT VELLORE  
T6-CL

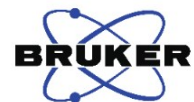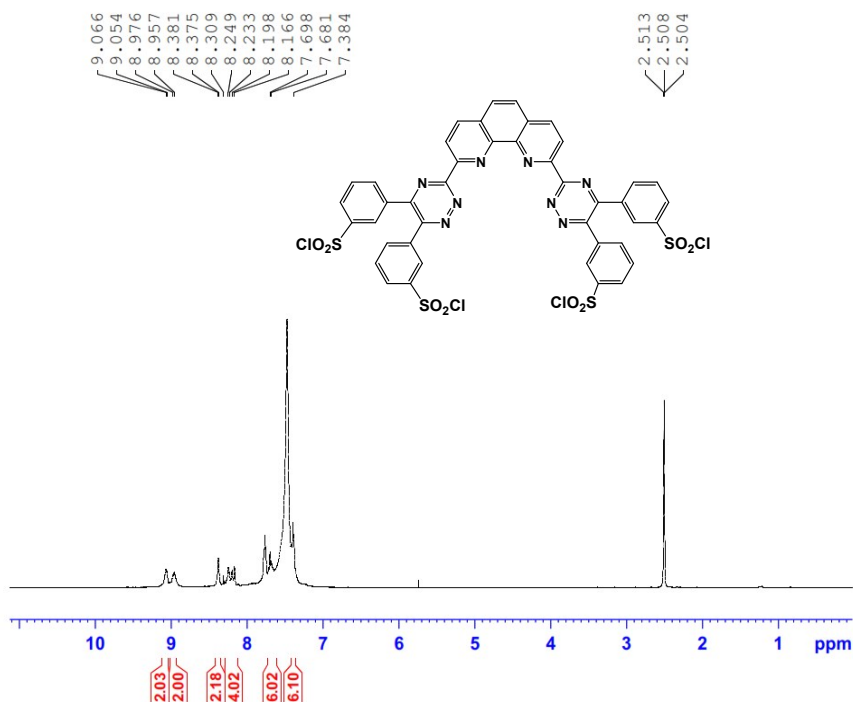

Current Data Parameters  
NAME Dr.SYN200819  
EXPNO 35  
PROCNO 1

F2 - Acquisition Parameters  
Date\_ 20190821  
Time\_ 1.32 h  
INSTRUM spect  
PROBHD Z108618\_0505 (   
PULPROG zg30  
TD 65536  
SOLVENT DMSO  
NS 16  
DS 2  
SWH 8012.820 Hz  
FIDRES 0.244532 Hz  
AQ 4.0894465 sec  
RG 112.69  
DW 62.400 usec  
DE 6.50 usec  
TE 303.0 K  
D1 1.00000000 sec  
TDO 1  
SF01 400.2604716 MHz  
NUCL 1H  
P1 14.00 usec  
PLW1 16.00000000 W

F2 - Processing parameters  
SI 65536  
SF 400.2580000 MHz  
WDW EM  
SSB 0  
LB 0.30 Hz  
GB 0  
PC 1.00

-2,9-diyl)-1,2,4- triazine-5,5,6,6-tetra[yl]tetra benzenesulfonyl Chloride (21)

Signature SIF VIT VELLORE  
T6-NA

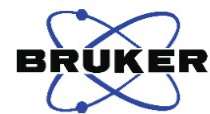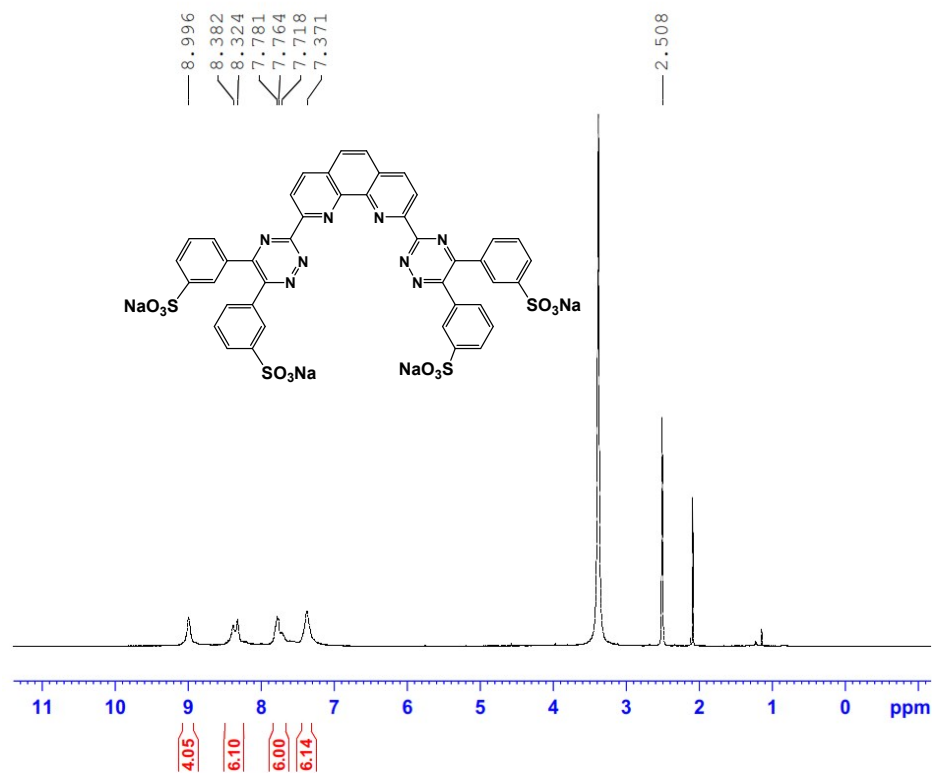

Current Data Parameters  
NAME Dr.SYN200819  
EXPNO 33  
PROCNO 1

F2 - Acquisition Parameters  
Date\_ 20190820  
Time 23.10 h  
INSTRUM spect  
PROBHD z108618\_0505 ( )  
PULPROG zg30  
TD 65536  
SOLVENT DMSO  
NS 16  
DS 2  
SWH 8012.820 Hz  
FIDRES 0.244532 Hz  
AQ 4.0894465 sec  
RG 127.79  
DW 62.400 usec  
DE 6.50 usec  
TE 301.1 K  
D1 1.00000000 sec  
TDO 1  
SFO1 400.2604716 MHz  
NUC1 1H  
P1 14.00 usec  
PLW1 16.00000000 W

F2 - Processing parameters  
SI 65536  
SF 400.2580000 MHz  
WDW EM  
SSB 0  
LB 0.30 Hz  
GB 0  
PC 1.00

<sup>1</sup>H-NMR spectrum of Sodium 3,3',3'',3'''-((1,10-phenanthroline-2,9-diyl) bis (1,2,4-triazine- 3,5,6-triyl)) tetra benzene sulfonate, SO<sub>3</sub>PhBTPhen (22)

**Compound Details**

**Cpd. 1: C35 H19 N7 Na4 O12 S4**

**Compound Spectra (overlaid)**

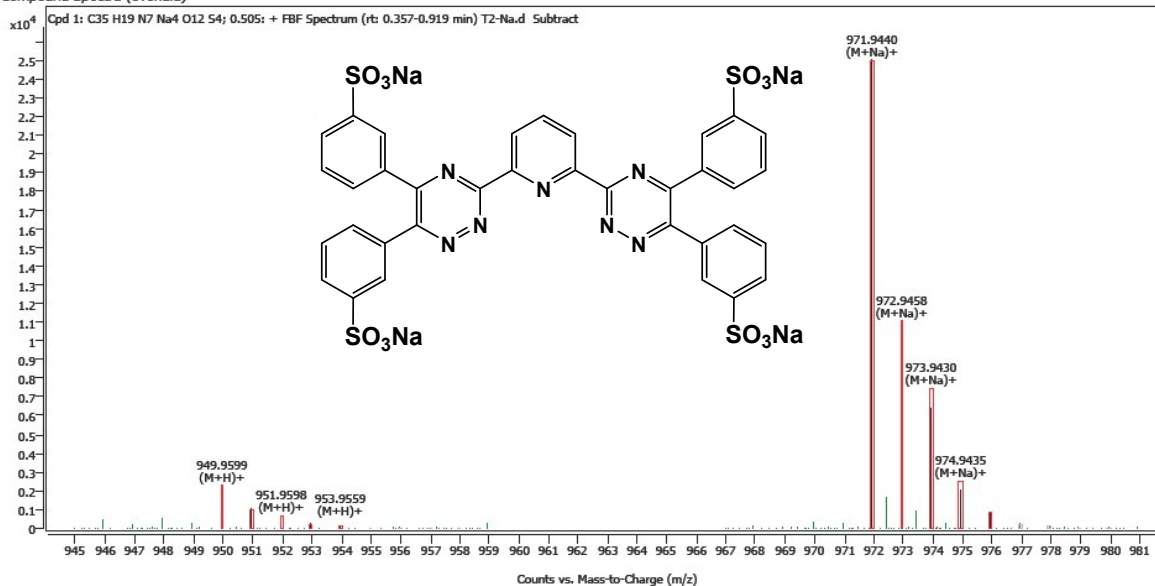

**Compound ID Table**

| Cpd | Formula               | Mass (Tqt) | Calc. Mass | Mass                 | Species                                   | Diff(Tqt.ppm) | mDa   |
|-----|-----------------------|------------|------------|----------------------|-------------------------------------------|---------------|-------|
| 1   | C35 H19 N7 Na4 O12 S4 | 948.9565   | 948.9543   | 949.9599<br>971.9440 | (M+H) <sup>+</sup><br>(M+Na) <sup>+</sup> | -2.40         | -2.27 |

ESI-MS spectra of sodium 3,3',3'',3'''-(pyridine-2,6-diylbis(1,2,4-triazine-3,5,6-triyl))tetra benzenesulfonate, SO<sub>3</sub>PhBTP (8)

|                |                               |              |                        |                                 |
|----------------|-------------------------------|--------------|------------------------|---------------------------------|
| Name           | 02072019-32-EXT-T4- Rack Pos. | Instrument   | Instrument 1           | Operator                        |
| Inj. Vol. (ul) | 5                             | IRM Status   | Success                |                                 |
| Data File      | T4-Na.d                       | Method (Acq) | Direct Infusion HPLC.m | Acq. Time (Local)               |
|                |                               |              |                        | 02-07-2019 11:04:30 (UTC+05:30) |

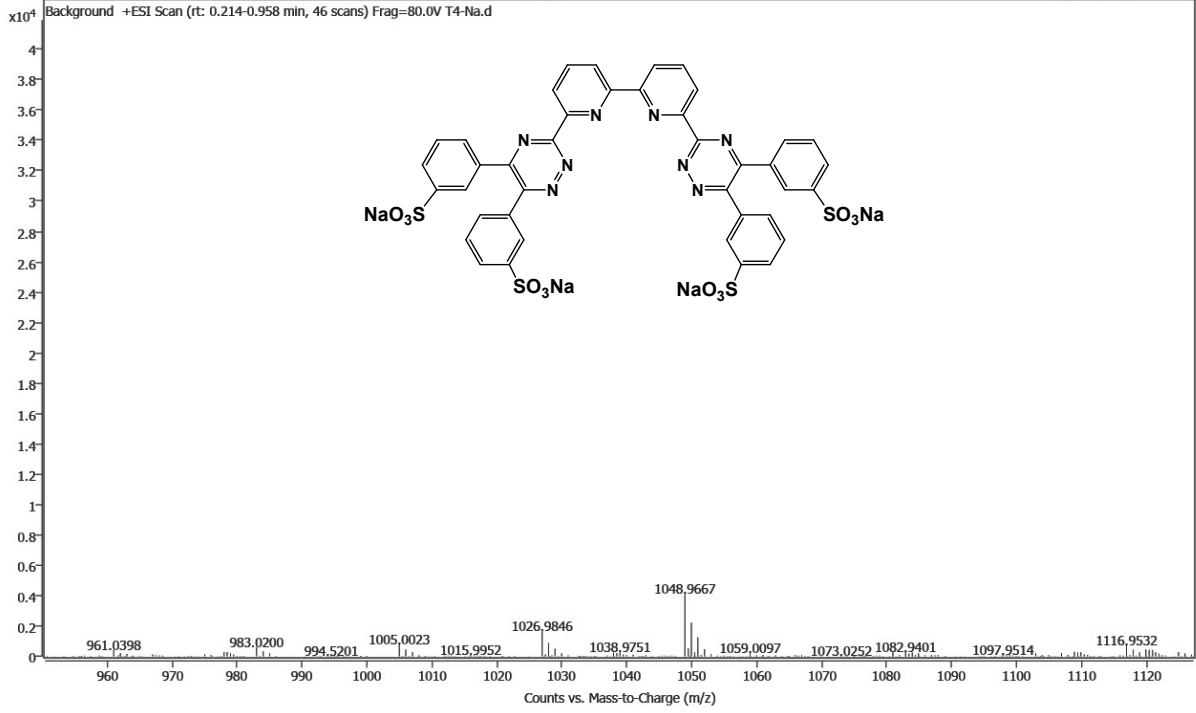

ESI-MS Spectra Tetrasodium 3,3',3'',3'''-[3-(2,2'-bipyridine-6,6'-diyl)-1,2,4-Triazine -5,5,6,6- tetrayl] tetra benzenesulfonate, SO<sub>3</sub>PhBTBP (15)

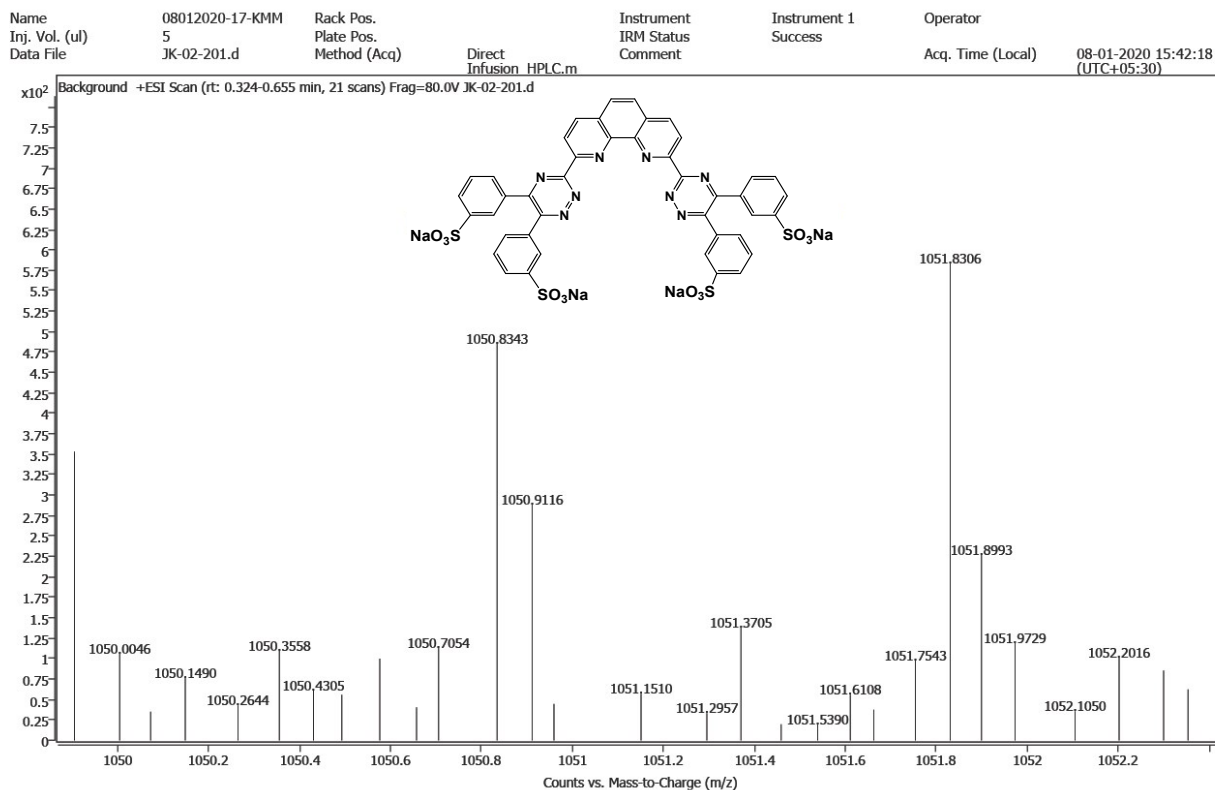

ESI-MS spectra of Sodium 3,3',3'',3'''-((1,10-phenanthroline-2,9-diyl) bis (1,2,4-triazine- 3,5,6-triyl)) tetra benzene sulfonate, SO<sub>3</sub>PhBTPhen (22)

## Computational Methodology

Geometries of the free BTP, BTBP, BTPPhen and TMDGA and their Am<sup>3+</sup> and Cm<sup>3+</sup> complexes of the type ML(H<sub>2</sub>O)<sub>6</sub> (for BTP), ML(H<sub>2</sub>O)<sub>5</sub> (for BTBP and BTPPhen) and ML<sub>3</sub> (for TMDGA) were optimized using def-SV(P) basis sets<sup>1</sup> for all the atoms as implemented in the TURBOMOLE-7.2 suits of program<sup>2, 3</sup>. In the cases of Am<sup>3+</sup> and Cm<sup>3+</sup>, 60 electron effective core potential (ECP) along with the corresponding def-SV(P) basis sets for the valence electrons are used for the optimization of the geometries of the complexes<sup>4-7</sup>. All the geometry optimizations were carried out employing the GGA functional BP86 which is composed of the Becke 1988 exchange functional<sup>8</sup> along with the Perdew 86 correlation functional<sup>9</sup>. The single point energies of the free ligands and the complexes were calculated using the hybrid functional B3LYP, which is a combination of Becke's three parameter Hartree Fock exchange (B3) and the

correlation functional of Lee, Yang and Parr (LYP)<sup>10</sup>. The basis sets of the valence triple zeta quality, viz. def-TZVP<sup>11</sup> as implemented in TURBOMOLE-7.2 package were used for the calculations of single point energies.

**Table S1:** Cartesian coordinates of the free BTP, BTBP, BTPhen and TMDGA and their Am<sup>3+</sup> and Cm<sup>3+</sup> complexes

**BTP**

|   |           |            |            |
|---|-----------|------------|------------|
| N | 3.8038380 | -5.2698290 | -4.4355443 |
| C | 4.4777405 | -6.4210324 | -4.5945152 |
| N | 4.4789109 | -4.1216614 | -4.4334828 |
| C | 5.8772313 | -6.4298698 | -4.7418818 |
| H | 3.8730070 | -7.3446457 | -4.5950417 |
| C | 5.8227489 | -4.1612940 | -4.5920987 |
| H | 6.4475220 | -7.3716719 | -4.8597424 |
| N | 6.5623040 | -5.2875059 | -4.7395675 |
| C | 6.5625765 | -2.8582389 | -4.5920154 |
| C | 7.9780028 | -2.8637281 | -4.6088988 |
| N | 5.8384904 | -1.7283151 | -4.5735638 |
| C | 8.6482562 | -1.6338775 | -4.5807980 |
| H | 8.5154477 | -3.8229519 | -4.6386562 |
| C | 6.4848306 | -0.5521075 | -4.5595764 |
| C | 7.8968801 | -0.4518329 | -4.5499555 |
| H | 9.7501405 | -1.5965301 | -4.5835398 |
| C | 5.6595195 | 0.6987006  | -4.5647946 |
| H | 8.3690841 | 0.5413787  | -4.5250208 |
| N | 6.3253767 | 1.8743334  | -4.4569433 |
| N | 4.3178700 | 0.5670019  | -4.6888686 |
| C | 5.5674399 | 2.9695074  | -4.4781417 |
| N | 3.5696150 | 1.6686420  | -4.7117865 |
| C | 4.1701577 | 2.8658128  | -4.6090353 |
| H | 6.0762197 | 3.9491689  | -4.3907644 |
| H | 3.5073943 | 3.7483012  | -4.6344056 |

**BTBP**

|   |            |            |           |
|---|------------|------------|-----------|
| C | -1.4016901 | -3.0589486 | 2.6765058 |
| C | -0.0066295 | -2.9731477 | 2.5985812 |
| C | 0.5709562  | -1.6895208 | 2.4587539 |
| C | -1.4966816 | -0.6403231 | 2.4569175 |
| C | -2.1617968 | -1.8838950 | 2.6090989 |
| H | -1.8978148 | -4.0366604 | 2.7940421 |

|   |            |            |           |
|---|------------|------------|-----------|
| H | 0.6400898  | -3.8613591 | 2.6472166 |
| H | -3.2577213 | -1.9449758 | 2.6856008 |
| C | -2.2584506 | 0.6561954  | 2.3671943 |
| C | -3.6733163 | 0.6817352  | 2.2717581 |
| C | -4.3287607 | 1.9179587  | 2.2018004 |
| H | -4.2644518 | -0.2455719 | 2.2415092 |
| C | -2.1622873 | 2.9719168  | 2.3053720 |
| C | -3.5690634 | 3.0935823  | 2.2204530 |
| H | -5.4280054 | 1.9620364  | 2.1283532 |
| H | -4.0289308 | 4.0911769  | 2.1671432 |
| C | -1.3219869 | 4.2138305  | 2.3125496 |
| C | -1.2096021 | 6.4850740  | 2.2432434 |
| C | 0.1904554  | 6.3659833  | 2.3156430 |
| C | 2.0635015  | -1.5646841 | 2.3873072 |
| C | 4.1027687  | -2.5730397 | 2.4116178 |
| C | 4.6779007  | -1.2959099 | 2.2789297 |
| N | -1.5344299 | 1.7885312  | 2.3788677 |
| N | -0.1566311 | -0.5644132 | 2.3888918 |
| N | 0.0217494  | 4.0680476  | 2.3875578 |
| N | 0.7815887  | 5.1619505  | 2.3883360 |
| N | -1.9788802 | 5.3979123  | 2.2414432 |
| N | 2.7794547  | -2.7134256 | 2.4665422 |
| N | 2.5875911  | -0.3241071 | 2.2503936 |
| N | 3.9120265  | -0.1951702 | 2.1968297 |
| H | -1.7114861 | 7.4707540  | 2.1867008 |
| H | 0.8633466  | 7.2412523  | 2.3176662 |
| H | 4.7207436  | -3.4900286 | 2.4723683 |
| H | 5.7693769  | -1.1356264 | 2.2332767 |

### **BTPhen**

|   |            |            |           |
|---|------------|------------|-----------|
| C | -1.4124325 | -3.0133683 | 2.4007953 |
| C | -0.0263227 | -2.9640130 | 2.3925893 |
| C | 0.6080852  | -1.6864583 | 2.4154739 |
| C | -1.4174743 | -0.5712969 | 2.4134380 |
| C | -2.1599509 | -1.8053651 | 2.4220239 |
| H | -1.9434402 | -3.9806820 | 2.3955466 |
| H | 0.5915106  | -3.8737097 | 2.3778686 |
| C | -2.1602588 | 0.6978678  | 2.4077842 |
| C | -3.5988319 | 0.6556426  | 2.4567394 |
| C | -4.2849610 | 1.8994986  | 2.4729603 |
| C | -2.1407400 | 3.0092016  | 2.3514672 |
| C | -3.5635604 | 3.0831290  | 2.4233430 |
| H | -5.3872427 | 1.9115045  | 2.5202965 |
| H | -4.0530479 | 4.0678242  | 2.4299025 |
| C | -1.3540053 | 4.2801604  | 2.2578486 |
| C | -1.3362414 | 6.5527124  | 2.1488289 |



|   |            |            |           |
|---|------------|------------|-----------|
| C | 0.0652891  | 6.4850755  | 2.0491265 |
| C | 2.1037675  | -1.6220689 | 2.4536391 |
| C | 4.0992956  | -2.7150037 | 2.4464604 |
| C | 4.7271113  | -1.4614620 | 2.5609263 |
| N | -1.4711018 | 1.8552475  | 2.3517097 |
| N | -0.0698043 | -0.5372676 | 2.4167656 |
| N | -0.0051733 | 4.1844552  | 2.1768771 |
| N | 0.7066099  | 5.3042184  | 2.0703602 |
| N | -2.0587996 | 5.4385605  | 2.2541509 |
| N | 2.7710149  | -2.8009188 | 2.3925727 |
| N | 2.6803613  | -0.4008024 | 2.5596511 |
| N | 4.0081110  | -0.3270669 | 2.6138940 |
| H | -1.8779175 | 7.5186721  | 2.1436024 |
| H | 0.6998535  | 7.3834064  | 1.9536000 |
| H | 4.6784430  | -3.6577298 | 2.3988737 |
| H | 5.8239735  | -1.3466590 | 2.6123947 |
| C | -4.2907847 | -0.6037541 | 2.4815296 |
| C | -3.5966627 | -1.7914559 | 2.4556891 |
| H | -5.3935487 | -0.6001253 | 2.5155199 |
| H | -4.1341724 | -2.7548756 | 2.4662778 |

**Am(BTP)(H<sub>2</sub>O)<sub>6</sub><sup>3+</sup>**

|   |           |            |            |
|---|-----------|------------|------------|
| N | 3.6972025 | -5.0967255 | -4.2746882 |
| C | 4.2500318 | -6.3074280 | -4.1832373 |
| N | 4.4642775 | -4.0240757 | -4.4828288 |
| C | 5.6581327 | -6.4513946 | -4.3465710 |
| H | 3.5736478 | -7.1581137 | -3.9934854 |
| C | 5.8055558 | -4.1831354 | -4.5755845 |
| H | 6.1457327 | -7.4441609 | -4.3234518 |
| N | 6.4226726 | -5.3803227 | -4.5335887 |
| C | 6.6216561 | -2.9498144 | -4.6926481 |
| C | 8.0256101 | -3.0308417 | -4.7986916 |
| N | 5.9500131 | -1.7704985 | -4.6354773 |
| C | 8.7699398 | -1.8410428 | -4.8301723 |
| H | 8.5078854 | -4.0200031 | -4.8439882 |
| C | 6.6817268 | -0.6272261 | -4.6244305 |
| C | 8.0898536 | -0.6184969 | -4.7234342 |
| H | 9.8684432 | -1.8676107 | -4.9176296 |
| C | 5.9382535 | 0.6460562  | -4.4407253 |
| H | 8.6242875 | 0.3441821  | -4.7056368 |
| N | 6.6333542 | 1.7928220  | -4.3043793 |
| N | 4.5910148 | 0.5666709  | -4.3927207 |
| C | 5.9331504 | 2.8973620  | -4.0623097 |
| N | 3.8900212 | 1.6726843  | -4.1339347 |
| C | 4.5153720 | 2.8367153  | -3.9462535 |

|    |           |            |            |
|----|-----------|------------|------------|
| H  | 6.4825201 | 3.8515704  | -3.9573589 |
| H  | 3.8891266 | 3.7159007  | -3.7186727 |
| Am | 3.3260107 | -1.7107900 | -4.9228020 |
| O  | 3.8506640 | -0.5106472 | -7.0280604 |
| H  | 3.8619636 | -1.1765149 | -7.7618735 |
| O  | 1.0941303 | -2.1290498 | -6.2947416 |
| H  | 0.6255891 | -2.7776365 | -5.7063107 |
| O  | 1.6848561 | -3.4430305 | -4.1035841 |
| H  | 1.1727457 | -3.4017490 | -3.2624655 |
| O  | 3.3643100 | -3.0576641 | -7.1589757 |
| H  | 2.3814355 | -3.0734085 | -7.3282989 |
| O  | 3.4368653 | -1.5660299 | -2.4018666 |
| H  | 2.8451222 | -0.9547870 | -1.9042018 |
| O  | 1.8739559 | 0.0983098  | -4.2717009 |
| H  | 0.9299415 | 0.3245627  | -4.4295481 |
| H  | 2.4254702 | 0.9755805  | -4.1479011 |
| H  | 0.4210979 | -1.6021683 | -6.7880227 |
| H  | 3.9549316 | 0.3910207  | -7.4082488 |
| H  | 3.7735651 | -3.8479368 | -7.5800689 |
| H  | 2.2189116 | -4.3277965 | -4.0993997 |
| H  | 4.0760206 | -1.9344547 | -1.7496066 |

**Cm(BTP)(H<sub>2</sub>O)<sub>6</sub><sup>3+</sup>**

|   |           |            |            |
|---|-----------|------------|------------|
| N | 3.5373379 | -5.0728698 | -4.0425419 |
| C | 4.0753248 | -6.2926617 | -4.0355122 |
| N | 4.3072293 | -4.0090127 | -4.3004105 |
| C | 5.4611311 | -6.4566219 | -4.3233943 |
| H | 3.4043415 | -7.1371721 | -3.8038885 |
| C | 5.6339163 | -4.1883126 | -4.4958212 |
| H | 5.9275178 | -7.4584518 | -4.3711032 |
| N | 6.2335234 | -5.3948263 | -4.5322377 |
| C | 6.4685409 | -2.9650806 | -4.6368935 |
| C | 7.8648128 | -3.0730260 | -4.8095820 |
| N | 5.8278758 | -1.7723681 | -4.5458169 |
| C | 8.6293729 | -1.8978320 | -4.8773988 |
| H | 8.3254040 | -4.0710680 | -4.8765437 |
| C | 6.5755790 | -0.6411410 | -4.6037062 |
| C | 7.9776237 | -0.6598952 | -4.7654527 |
| H | 9.7228881 | -1.9465638 | -5.0074373 |
| C | 5.8592417 | 0.6544899  | -4.4563143 |
| H | 8.5301812 | 0.2919573  | -4.7957029 |
| N | 6.5800931 | 1.7932583  | -4.4120019 |
| N | 4.5113032 | 0.6114428  | -4.3585350 |
| C | 5.9089772 | 2.9255125  | -4.2238518 |
| N | 3.8382555 | 1.7460266  | -4.1422534 |

|    |           |            |            |
|----|-----------|------------|------------|
| C  | 4.4943051 | 2.9041398  | -4.0584972 |
| H  | 6.4801431 | 3.8723306  | -4.1976169 |
| H  | 3.8949042 | 3.8104661  | -3.8679810 |
| Cm | 3.2056915 | -1.6493192 | -4.5140305 |
| O  | 3.6678600 | -1.1008623 | -6.8129282 |
| H  | 3.7729113 | -1.7448723 | -7.6418209 |
| O  | 1.3186499 | -2.3845408 | -5.8989835 |
| H  | 0.6883353 | -2.9624765 | -5.4026569 |
| O  | 1.6395655 | -3.3369176 | -3.5118728 |
| H  | 1.0948830 | -3.3448629 | -2.6918550 |
| O  | 3.9649361 | -2.7231080 | -8.7607791 |
| H  | 3.2569445 | -2.9096716 | -9.4202356 |
| O  | 3.6519149 | -1.3444672 | -2.0637555 |
| H  | 3.0690420 | -0.7991817 | -1.4847513 |
| O  | 1.7899009 | 0.1845719  | -3.9195724 |
| H  | 0.8242181 | 0.3739527  | -3.9392168 |
| H  | 2.3288481 | 1.0696682  | -3.9510918 |
| H  | 0.9196954 | -2.1255625 | -6.7605452 |
| H  | 3.8293797 | -0.1889090 | -7.1413947 |
| H  | 4.8133416 | -2.7560690 | -9.2604556 |
| H  | 2.1157147 | -4.2444725 | -3.5983447 |
| H  | 4.3254128 | -1.7567371 | -1.4747912 |

**Am(BTBP)(H<sub>2</sub>O)<sub>5</sub><sup>3+</sup>**

|   |            |            |           |
|---|------------|------------|-----------|
| C | -1.4490250 | -3.0579593 | 2.0451217 |
| C | -0.0481589 | -2.9980374 | 2.0780423 |
| C | 0.5626762  | -1.7421908 | 2.2534408 |
| C | -1.4944947 | -0.6426029 | 2.3784684 |
| C | -2.1765408 | -1.8728982 | 2.2082390 |
| H | -1.9688324 | -4.0189651 | 1.9002694 |
| H | 0.5780549  | -3.8977235 | 1.9775451 |
| H | -3.2747158 | -1.9121137 | 2.1829308 |
| C | -2.2364575 | 0.6395185  | 2.5519172 |
| C | -3.6282578 | 0.6627972  | 2.8171835 |
| C | -4.2977949 | 1.8865615  | 2.9332544 |
| H | -4.1935729 | -0.2707778 | 2.9470660 |
| C | -2.1920164 | 2.9744861  | 2.4928445 |
| C | -3.5711639 | 3.0724804  | 2.7491865 |
| H | -5.3777065 | 1.9155665  | 3.1508553 |
| H | -4.0473405 | 4.0641404  | 2.7929712 |
| C | -1.4059425 | 4.1969988  | 2.2096535 |
| C | -1.3078032 | 6.4410660  | 1.7977257 |
| C | 0.0620646  | 6.2776851  | 1.4418075 |
| C | 2.0395446  | -1.6605202 | 2.3699546 |
| C | 4.0699174  | -2.7026656 | 2.4907409 |

|    |            |            |            |
|----|------------|------------|------------|
| C  | 4.6557540  | -1.4419341 | 2.7973492  |
| N  | -1.5254967 | 1.7897606  | 2.4276285  |
| N  | -0.1368564 | -0.5812020 | 2.3774957  |
| N  | -0.0849777 | 4.0317678  | 1.9708320  |
| N  | 0.6339206  | 5.0788808  | 1.5592814  |
| N  | -2.0334250 | 5.3894513  | 2.1601957  |
| N  | 2.7594441  | -2.7989068 | 2.2968449  |
| N  | 2.5784801  | -0.4395802 | 2.5853481  |
| N  | 3.8902826  | -0.3510280 | 2.8215323  |
| Am | 1.0875454  | 1.7545501  | 2.5118701  |
| O  | 0.5819398  | 1.0134444  | 4.8032496  |
| H  | 0.8097349  | 1.7741765  | 5.3999189  |
| O  | 1.5400547  | 3.3879437  | 4.5733456  |
| H  | 2.5264661  | 3.2672855  | 4.6224034  |
| O  | 3.4194779  | 2.1294927  | 3.2821346  |
| H  | 3.8149952  | 2.7679957  | 2.6387187  |
| O  | 2.4847463  | 3.3308426  | 1.0471870  |
| H  | 3.1076446  | 3.3396858  | 0.2859241  |
| O  | 0.8394273  | 1.1071838  | 0.1141231  |
| H  | 1.1746239  | 1.6526568  | -0.6338785 |
| H  | 0.2787843  | 0.3997229  | -0.2785570 |
| H  | 2.0114300  | 4.2434157  | 1.1023844  |
| H  | 3.9426524  | 1.2346331  | 3.2103760  |
| H  | 1.3195395  | 4.2819327  | 4.9224311  |
| H  | 0.2992257  | 0.2381774  | 5.3368877  |
| H  | -1.7979962 | 7.4324126  | 1.7762800  |
| H  | 0.6939059  | 7.1047309  | 1.0763727  |
| H  | 4.6790362  | -3.6225523 | 2.4141581  |
| H  | 5.7286655  | -1.3093965 | 3.0162845  |

**Cm(BTBP)(H<sub>2</sub>O)<sub>5</sub><sup>3+</sup>**

|   |            |            |           |
|---|------------|------------|-----------|
| C | -1.5223152 | -2.9730440 | 2.6606147 |
| C | -0.1427494 | -2.9035647 | 2.9078065 |
| C | 0.4981867  | -1.6583925 | 2.7709616 |
| C | -1.5046086 | -0.5760347 | 2.2279432 |
| C | -2.2073283 | -1.8019629 | 2.3114697 |
| H | -2.0611370 | -3.9307138 | 2.7470236 |
| H | 0.4446246  | -3.7896314 | 3.1933699 |
| H | -3.2916680 | -1.8458285 | 2.1356949 |
| C | -2.2084666 | 0.7175665  | 1.9801142 |
| C | -3.5643979 | 0.7819821  | 1.5787064 |
| C | -4.2033815 | 2.0260896  | 1.4922983 |
| H | -4.1265563 | -0.1303287 | 1.3324917 |
| C | -2.1422687 | 3.0447019  | 2.2194587 |
| C | -3.4926863 | 3.1823307  | 1.8529979 |

|    |            |            |            |
|----|------------|------------|------------|
| H  | -5.2563077 | 2.0913025  | 1.1732979  |
| H  | -3.9633804 | 4.1775161  | 1.8637212  |
| C  | -1.3702646 | 4.2185372  | 2.6996111  |
| C  | -1.2920464 | 6.3939382  | 3.3830827  |
| C  | 0.0540831  | 6.1792600  | 3.7944068  |
| C  | 1.9714986  | -1.5676962 | 2.9417289  |
| C  | 3.9748787  | -2.5625938 | 3.3938891  |
| C  | 4.6203430  | -1.3562423 | 2.9987007  |
| N  | -1.4988574 | 1.8466788  | 2.2361269  |
| N  | -0.1645179 | -0.5154521 | 2.4458566  |
| N  | -0.0724418 | 4.0088263  | 3.0110269  |
| N  | 0.6298062  | 4.9962813  | 3.5703296  |
| N  | -1.9964114 | 5.4041318  | 2.8423257  |
| N  | 2.6516319  | -2.6663338 | 3.3289725  |
| N  | 2.5536475  | -0.3841633 | 2.6493705  |
| N  | 3.8887467  | -0.3001370 | 2.6400238  |
| Cm | 1.0817908  | 1.7554968  | 2.2627064  |
| O  | 0.8131362  | 1.3323711  | 4.6858847  |
| H  | 1.3831491  | 1.9033973  | 5.2541306  |
| O  | 2.4942136  | 3.2083492  | 3.6635519  |
| H  | 3.4663121  | 3.3390969  | 3.7243966  |
| O  | 3.3841973  | 1.7505543  | 1.1049008  |
| H  | 3.9503713  | 2.4898223  | 0.7866783  |
| O  | 0.8145204  | 3.3052999  | 0.3278580  |
| H  | 0.8182614  | 2.7551268  | -0.4958680 |
| O  | 1.2531599  | 0.7827919  | -0.1231255 |
| H  | 0.9136218  | 0.0080449  | -0.6273303 |
| H  | 2.2454732  | 0.8154228  | -0.2057775 |
| H  | 0.8109830  | 4.2564804  | 0.0772959  |
| H  | 3.9599990  | 1.0952616  | 1.6435760  |
| H  | 2.0200478  | 4.1227859  | 3.7804306  |
| H  | 0.1518669  | 0.8826047  | 5.2593927  |
| H  | -1.7809849 | 7.3793481  | 3.4980901  |
| H  | 0.6680035  | 6.9554149  | 4.2814647  |
| H  | 4.5505574  | -3.4402112 | 3.7423925  |
| H  | 5.7171237  | -1.2440924 | 2.9632702  |

**Am(BTPhen)(H<sub>2</sub>O)<sub>5</sub><sup>3+</sup>**

|   |            |            |           |
|---|------------|------------|-----------|
| C | -1.5088973 | -2.9784465 | 2.5703906 |
| C | -0.1371334 | -2.9319075 | 2.8014870 |
| C | 0.5233096  | -1.6789172 | 2.7408640 |
| C | -1.4694996 | -0.5472601 | 2.3283813 |
| C | -2.2186410 | -1.7741041 | 2.3163905 |
| H | -2.0466106 | -3.9408594 | 2.5883445 |
| H | 0.4474367  | -3.8403541 | 3.0119101 |

|    |            |            |            |
|----|------------|------------|------------|
| C  | -2.1762906 | 0.7134339  | 2.1702482  |
| C  | -3.5953431 | 0.6991533  | 1.9419161  |
| C  | -4.2548800 | 1.9517465  | 1.8259879  |
| C  | -2.1431895 | 3.0411431  | 2.2687389  |
| C  | -3.5315025 | 3.1282418  | 2.0033262  |
| H  | -5.3389886 | 1.9870573  | 1.6288947  |
| H  | -4.0127491 | 4.1175900  | 1.9682340  |
| C  | -1.3745504 | 4.2551575  | 2.6215411  |
| C  | -1.3035878 | 6.4810771  | 3.1278939  |
| C  | 0.0406283  | 6.3028945  | 3.5595505  |
| C  | 1.9950541  | -1.6108378 | 2.8924018  |
| C  | 3.9978800  | -2.6320593 | 3.2941771  |
| C  | 4.6453207  | -1.4034426 | 2.9822780  |
| N  | -1.4708153 | 1.8685894  | 2.3058905  |
| N  | -0.1220022 | -0.5135317 | 2.5126293  |
| N  | -0.0680672 | 4.0802142  | 2.9292980  |
| N  | 0.6207040  | 5.1084291  | 3.4219054  |
| N  | -2.0048413 | 5.4450220  | 2.6787832  |
| N  | 2.6748602  | -2.7295088 | 3.2185082  |
| N  | 2.5805894  | -0.4147950 | 2.6516192  |
| N  | 3.9122200  | -0.3342188 | 2.6672620  |
| Am | 1.1398348  | 1.7974650  | 2.3502990  |
| O  | 0.8895643  | 1.3668174  | 4.7692869  |
| H  | 1.4277514  | 2.0258791  | 5.2737730  |
| O  | 2.4133205  | 3.3125352  | 3.8713643  |
| H  | 3.3880592  | 3.4342521  | 3.9132189  |
| O  | 3.4245205  | 1.8882270  | 1.4797233  |
| H  | 3.9948007  | 2.6041057  | 1.1224859  |
| O  | 0.9579912  | 3.2478582  | 0.3367976  |
| H  | 0.9973599  | 2.6017663  | -0.4180538 |
| O  | 1.1380522  | 0.7145501  | -0.1740671 |
| H  | 0.4618395  | 0.1305300  | -0.5907801 |
| H  | 2.0100770  | 0.4102441  | -0.5195567 |
| H  | 1.0400685  | 4.1651008  | -0.0073428 |
| H  | 3.9996657  | 1.1465142  | 1.9051370  |
| H  | 1.9626662  | 4.2430871  | 3.8420960  |
| H  | 0.3472031  | 0.8382117  | 5.3968914  |
| H  | -1.7955300 | 7.4711856  | 3.1580053  |
| H  | 0.6490080  | 7.1120027  | 3.9971821  |
| H  | 4.5717470  | -3.5310611 | 3.5865867  |
| H  | 5.7416495  | -1.2831530 | 2.9751815  |
| C  | -4.2974004 | -0.5554750 | 1.8713148  |
| C  | -3.6361519 | -1.7474306 | 2.0668050  |
| H  | -5.3830702 | -0.5454660 | 1.6829737  |
| H  | -4.1879636 | -2.7009004 | 2.0412281  |

**Cm(BTPhen)(H<sub>2</sub>O)<sub>5</sub><sup>3+</sup>**

|    |            |            |            |
|----|------------|------------|------------|
| C  | -1.5217959 | -2.9720642 | 2.5485817  |
| C  | -0.1565884 | -2.9224733 | 2.8200405  |
| C  | 0.5042563  | -1.6695057 | 2.7730005  |
| C  | -1.4828666 | -0.5434614 | 2.3004856  |
| C  | -2.2291714 | -1.7705282 | 2.2734608  |
| H  | -2.0570745 | -3.9360492 | 2.5553256  |
| H  | 0.4218327  | -3.8294273 | 3.0528815  |
| C  | -2.1886549 | 0.7177176  | 2.1365897  |
| C  | -3.6060972 | 0.7061879  | 1.9055063  |
| C  | -4.2650410 | 1.9622612  | 1.8197169  |
| C  | -2.1539335 | 3.0439670  | 2.2890397  |
| C  | -3.5443925 | 3.1351508  | 2.0354022  |
| H  | -5.3487672 | 2.0025108  | 1.6211907  |
| H  | -4.0307151 | 4.1226247  | 2.0365697  |
| C  | -1.3775982 | 4.2451839  | 2.6793065  |
| C  | -1.2932018 | 6.4501467  | 3.2602003  |
| C  | 0.0651048  | 6.2614255  | 3.6413036  |
| C  | 1.9740482  | -1.5943987 | 2.9611393  |
| C  | 3.9687563  | -2.6024071 | 3.4187637  |
| C  | 4.6209661  | -1.3874197 | 3.0653933  |
| N  | -1.4832096 | 1.8703681  | 2.2851024  |
| N  | -0.1404132 | -0.5085625 | 2.5199384  |
| N  | -0.0687908 | 4.0555524  | 2.9634638  |
| N  | 0.6409830  | 5.0708698  | 3.4570022  |
| N  | -2.0076892 | 5.4326490  | 2.7880363  |
| N  | 2.6464194  | -2.7047681 | 3.3280496  |
| N  | 2.5621242  | -0.4043621 | 2.7010676  |
| N  | 3.8961770  | -0.3232780 | 2.7133302  |
| Cm | 1.1012864  | 1.7653331  | 2.2924543  |
| O  | 0.8587419  | 1.4096441  | 4.7234751  |
| H  | 1.4090187  | 2.0106700  | 5.2798383  |
| O  | 2.5015184  | 3.2864611  | 3.6292665  |
| H  | 3.4731986  | 3.4188159  | 3.6919940  |
| O  | 3.4050934  | 1.7150867  | 1.1553392  |
| H  | 3.9749753  | 2.4471894  | 0.8277012  |
| O  | 0.8609038  | 3.2730970  | 0.3215074  |
| H  | 0.8516341  | 2.7098486  | -0.4928050 |
| O  | 1.2610254  | 0.7348021  | -0.0703026 |
| H  | 0.8966201  | -0.0404018 | -0.5560446 |
| H  | 2.2513365  | 0.7411903  | -0.1665244 |
| H  | 0.8475441  | 4.2199557  | 0.0559966  |
| H  | 3.9759559  | 1.0682921  | 1.7087237  |
| H  | 2.0277032  | 4.2063574  | 3.6996001  |
| H  | 0.2418941  | 0.9168008  | 5.3108619  |
| H  | -1.7849926 | 7.4371780  | 3.3448385  |

|   |            |            |           |
|---|------------|------------|-----------|
| H | 0.6879085  | 7.0616252  | 4.0750696 |
| H | 4.5386093  | -3.4895147 | 3.7523672 |
| H | 5.7181474  | -1.2750298 | 3.0524204 |
| C | -4.3041411 | -0.5494491 | 1.8094783 |
| C | -3.6424187 | -1.7428028 | 1.9981497 |
| H | -5.3880322 | -0.5401794 | 1.6111160 |
| H | -4.1927209 | -2.6965273 | 1.9549922 |

**Am(TMDGA)<sub>3</sub><sup>3+</sup>**

|    |            |             |            |
|----|------------|-------------|------------|
| H  | 13.0542181 | -17.0351639 | 10.4872245 |
| C  | 12.6278268 | -17.0150343 | 9.4544630  |
| H  | 11.7016631 | -17.6379979 | 9.4547026  |
| O  | 12.3221096 | -15.6801197 | 9.0716013  |
| C  | 13.6457295 | -17.5494252 | 8.4402853  |
| C  | 11.3602828 | -15.0547202 | 9.9139308  |
| O  | 14.0724500 | -16.7601189 | 7.5501656  |
| H  | 10.4218300 | -15.6592218 | 9.9414977  |
| H  | 11.7531993 | -14.9805412 | 10.9562866 |
| C  | 11.0890271 | -13.6627238 | 9.3268071  |
| O  | 11.6787949 | -13.3394097 | 8.2593984  |
| H  | 9.8292923  | -13.5476457 | 4.7002423  |
| C  | 10.8085994 | -14.0532376 | 4.5146410  |
| H  | 10.9861428 | -14.0595950 | 3.4121466  |
| O  | 11.8542799 | -13.3612996 | 5.1806996  |
| C  | 10.7923571 | -15.4821307 | 5.0731651  |
| C  | 11.9787794 | -12.0002804 | 4.7945480  |
| O  | 11.6022905 | -15.7734731 | 5.9976742  |
| H  | 12.1562672 | -11.9217145 | 3.6940479  |
| H  | 11.0395526 | -11.4437978 | 5.0305392  |
| C  | 13.1682142 | -11.4231995 | 5.5738443  |
| O  | 13.8116984 | -12.1933866 | 6.3408325  |
| H  | 17.2704091 | -13.9293120 | 5.0228405  |
| C  | 16.6863824 | -14.7975970 | 5.4147616  |
| H  | 17.3982953 | -15.6415753 | 5.5796993  |
| O  | 16.0457482 | -14.4449606 | 6.6348940  |
| C  | 15.5814256 | -15.1979007 | 4.4277335  |
| C  | 16.9514467 | -14.0300726 | 7.6495379  |
| O  | 14.3806389 | -15.0976488 | 4.8001980  |
| H  | 17.6468736 | -14.8639313 | 7.9123508  |
| H  | 17.5684549 | -13.1711782 | 7.2908636  |
| C  | 16.1077739 | -13.6231392 | 8.8633765  |
| O  | 14.8536636 | -13.7652260 | 8.7916801  |
| Am | 13.4229583 | -14.5016549 | 6.9854500  |
| N  | 15.9391012 | -15.6425868 | 3.2104737  |
| N  | 16.7257962 | -13.1325480 | 9.9490605  |



|   |            |             |            |
|---|------------|-------------|------------|
| N | 14.0450477 | -18.8273760 | 8.5349596  |
| N | 10.2375039 | -12.8443171 | 9.9689118  |
| N | 9.9205466  | -16.3670007 | 4.5617131  |
| N | 13.4851221 | -10.1277525 | 5.4116875  |
| C | 8.9629855  | -16.0626894 | 3.4911290  |
| H | 9.2686197  | -16.5602751 | 2.5436521  |
| H | 7.9609274  | -16.4472781 | 3.7783239  |
| H | 8.8691966  | -14.9751276 | 3.3122337  |
| C | 9.9016449  | -17.7549630 | 5.0367619  |
| H | 10.7091305 | -17.8996977 | 5.7772738  |
| H | 8.9167929  | -17.9831375 | 5.5005324  |
| H | 10.0539769 | -18.4439535 | 4.1773833  |
| C | 12.8006348 | -9.2138465  | 4.4893548  |
| H | 12.5123831 | -8.2881953  | 5.0329105  |
| H | 13.4810077 | -8.9297323  | 3.6556288  |
| H | 11.8841162 | -9.6612432  | 4.0621355  |
| C | 14.6191092 | -9.5440650  | 6.1372504  |
| H | 14.2786727 | -8.6451102  | 6.6952923  |
| H | 15.0249478 | -10.2903738 | 6.8441859  |
| H | 15.4102095 | -9.2344173  | 5.4190684  |
| C | 14.9220404 | -16.0926348 | 2.2537547  |
| H | 14.9410699 | -15.4478691 | 1.3478338  |
| H | 15.1385332 | -17.1390360 | 1.9460109  |
| H | 13.9258647 | -16.0438341 | 2.7299515  |
| C | 17.3292004 | -15.7770741 | 2.7575722  |
| H | 17.4034109 | -15.4186696 | 1.7089806  |
| H | 18.0251891 | -15.1716439 | 3.3685920  |
| H | 17.6514154 | -16.8424203 | 2.7838219  |
| C | 15.9483554 | -12.6854852 | 11.1109352 |
| H | 16.1745542 | -13.3292418 | 11.9891701 |
| H | 16.2263940 | -11.6384804 | 11.3602743 |
| H | 14.8701206 | -12.7382247 | 10.8738968 |
| C | 18.1797757 | -12.9617668 | 10.0644733 |
| H | 18.5100645 | -13.3313876 | 11.0584153 |
| H | 18.7276528 | -13.5339648 | 9.2924484  |
| H | 18.4537985 | -11.8860706 | 9.9842598  |
| C | 14.9815364 | -19.3909925 | 7.5555485  |
| H | 15.9282357 | -19.6834243 | 8.0610157  |
| H | 14.5336257 | -20.2981038 | 7.0948149  |
| H | 15.1899555 | -18.6391851 | 6.7728570  |
| C | 13.5624012 | -19.7658606 | 9.5564958  |
| H | 14.4197376 | -20.3644743 | 9.9299714  |
| H | 13.1157625 | -19.2424244 | 10.4230939 |
| H | 12.8116161 | -20.4651941 | 9.1241901  |
| C | 9.4986456  | -13.1993641 | 11.1858791 |
| H | 9.6804755  | -12.4317066 | 11.9691952 |

|   |            |             |            |
|---|------------|-------------|------------|
| H | 8.4067006  | -13.2279185 | 10.9739038 |
| H | 9.8044249  | -14.1828276 | 11.5883707 |
| C | 9.9531335  | -11.5060176 | 9.4397593  |
| H | 10.1465734 | -10.7465793 | 10.2279636 |
| H | 10.6039091 | -11.3117799 | 8.5678914  |
| H | 8.8846775  | -11.4358098 | 9.1376965  |

**Cm(TMDGA)<sub>3</sub><sup>3+</sup>**

|    |            |             |            |
|----|------------|-------------|------------|
| H  | 13.0775751 | -17.0391816 | 10.4417058 |
| C  | 12.6620806 | -17.0303103 | 9.4042458  |
| H  | 11.7550541 | -17.6808803 | 9.3946285  |
| O  | 12.3233390 | -15.7040561 | 9.0213779  |
| C  | 13.7077692 | -17.5342510 | 8.4020015  |
| C  | 11.3763980 | -15.0870196 | 9.8844859  |
| O  | 14.1331832 | -16.7322293 | 7.5247785  |
| H  | 10.4290333 | -15.6778642 | 9.9054928  |
| H  | 11.7778967 | -15.0423968 | 10.9253458 |
| C  | 11.1224223 | -13.6764591 | 9.3351629  |
| O  | 11.7114386 | -13.3350494 | 8.2719420  |
| H  | 9.7941259  | -13.5172640 | 4.7146346  |
| C  | 10.7606051 | -14.0437647 | 4.5213629  |
| H  | 10.9228090 | -14.0663685 | 3.4169684  |
| O  | 11.8296539 | -13.3600761 | 5.1622157  |
| C  | 10.7269621 | -15.4652060 | 5.0984037  |
| C  | 11.9771208 | -12.0107608 | 4.7378538  |
| O  | 11.5408219 | -15.7550675 | 6.0194677  |
| H  | 12.1360070 | -11.9672840 | 3.6328066  |
| H  | 11.0533834 | -11.4300654 | 4.9749493  |
| C  | 13.1925753 | -11.4375087 | 5.4801314  |
| O  | 13.8393019 | -12.2036035 | 6.2475944  |
| H  | 17.2526127 | -13.8930344 | 5.0602447  |
| C  | 16.6725888 | -14.7622610 | 5.4556325  |
| H  | 17.3904852 | -15.5962409 | 5.6432207  |
| O  | 16.0093304 | -14.4023110 | 6.6608108  |
| C  | 15.5881862 | -15.1907247 | 4.4578169  |
| C  | 16.8956748 | -14.0013063 | 7.6977810  |
| O  | 14.3803402 | -15.1077171 | 4.8153107  |
| H  | 17.5975475 | -14.8336604 | 7.9475655  |
| H  | 17.5064115 | -13.1260611 | 7.3696387  |
| C  | 16.0318455 | -13.6372498 | 8.9120226  |
| O  | 14.7824867 | -13.8019270 | 8.8282792  |
| Cm | 13.3959845 | -14.4877077 | 6.9519188  |
| N  | 15.9640238 | -15.6385552 | 3.2483371  |
| N  | 16.6347362 | -13.1561485 | 10.0113555 |
| N  | 14.1274191 | -18.8062804 | 8.4992061  |

|   |            |             |            |
|---|------------|-------------|------------|
| N | 10.2871723 | -12.8615118 | 10.0005638 |
| N | 9.8382854  | -16.3425629 | 4.6041925  |
| N | 13.5239496 | -10.1501790 | 5.2862609  |
| C | 8.8833548  | -16.0381169 | 3.5311259  |
| H | 9.1867149  | -16.5413279 | 2.5858396  |
| H | 7.8793891  | -16.4163125 | 3.8196345  |
| H | 8.7945591  | -14.9506963 | 3.3483437  |
| C | 9.8020615  | -17.7243513 | 5.0963465  |
| H | 10.5971047 | -17.8652218 | 5.8508647  |
| H | 8.8086043  | -17.9383666 | 5.5479860  |
| H | 9.9622638  | -18.4260990 | 4.2486873  |
| C | 12.8298840 | -9.2404614  | 4.3669583  |
| H | 12.5269065 | -8.3203998  | 4.9124723  |
| H | 13.5109963 | -8.9446997  | 3.5381485  |
| H | 11.9229509 | -9.6986244  | 3.9310910  |
| C | 14.6778217 | -9.5676284  | 5.9809450  |
| H | 14.3574424 | -8.6566464  | 6.5314165  |
| H | 15.0893944 | -10.3071860 | 6.6915584  |
| H | 15.4579448 | -9.2775441  | 5.2430251  |
| C | 14.9626371 | -16.1065113 | 2.2832163  |
| H | 14.9888883 | -15.4700961 | 1.3716381  |
| H | 15.1921567 | -17.1537652 | 1.9883107  |
| H | 13.9599035 | -16.0615959 | 2.7455784  |
| C | 17.3584867 | -15.7487706 | 2.8025853  |
| H | 17.4475488 | -15.3251013 | 1.7793560  |
| H | 18.0511480 | -15.1916272 | 3.4607480  |
| H | 17.6723035 | -16.8159180 | 2.7652999  |
| C | 15.8420715 | -12.7408493 | 11.1743406 |
| H | 16.0810478 | -13.3872870 | 12.0471765 |
| H | 16.0913953 | -11.6893603 | 11.4354426 |
| H | 14.7666363 | -12.8187866 | 10.9317821 |
| C | 18.0841085 | -12.9547515 | 10.1354189 |
| H | 18.4121968 | -13.3032918 | 11.1374439 |
| H | 18.6491753 | -13.5301949 | 9.3781570  |
| H | 18.3401939 | -11.8756583 | 10.0411532 |
| C | 15.0843458 | -19.3525674 | 7.5301708  |
| H | 16.0226484 | -19.6482074 | 8.0491205  |
| H | 14.6497916 | -20.2544784 | 7.0465622  |
| H | 15.3040387 | -18.5883534 | 6.7627100  |
| C | 13.6288497 | -19.7549877 | 9.5040394  |
| H | 14.4639743 | -20.4148245 | 9.8179187  |
| H | 13.2541007 | -19.2390852 | 10.4091850 |
| H | 12.8205053 | -20.3944553 | 9.0824270  |
| C | 9.5502210  | -13.2342064 | 11.2136922 |
| H | 9.7609822  | -12.4971135 | 12.0188257 |
| H | 8.4562686  | -13.2247747 | 11.0112699 |

|   |            |             |            |
|---|------------|-------------|------------|
| H | 9.8306158  | -14.2387244 | 11.5808503 |
| C | 10.0230250 | -11.5048607 | 9.5078774  |
| H | 10.2440821 | -10.7687768 | 10.3109244 |
| H | 10.6640038 | -11.3025090 | 8.6306400  |
| H | 8.9516187  | -11.4063079 | 9.2250710  |

## References

1. A. Schäfer, H. Horn and R. Ahlrichs, *The Journal of Chemical Physics*, 1992, **97**, 2571-2577.
2. R. Ahlrichs, M. Bär, M. Häser, H. Horn and C. Kölmel, *Chemical Physics Letters*, 1989, **162**, 165-169.
3. TURBOMOLE V7.0 a development of the University of Karlsruhe and Forschungszentrum Karlsruhe GmbH, TURBOMOLE GmbH, since 2007; available from <http://www.turbomole.com>.
4. K. Eichkorn, F. Weigend, O. Treutler and R. Ahlrichs, *Theoretical Chemistry Accounts*, 1997, **97**, 119-124.
5. M. Dolg, H. Stoll and H. Preuss, *The Journal of chemical physics*, 1989, **90**, 1730-1734.
6. W. Küchle, M. Dolg, H. Stoll and H. Preuss, *The Journal of chemical physics*, 1994, **100**, 7535-7542.
7. X. Cao, M. Dolg and H. Stoll, *The Journal of chemical physics*, 2003, **118**, 487-496.
8. A. D. Becke, *Physical review A*, 1988, **38**, 3098.
9. J. P. Perdew, *Physical Review B*, 1986, **33**, 8822.
10. C. Lee, W. Yang and R. G. Parr, *Physical review B*, 1988, **37**, 785.
11. A. Schäfer, C. Huber and R. Ahlrichs, *The Journal of Chemical Physics*, 1994, **100**, 5829-5835.
